# Supplementary material for: Efficient Production of Gene-Modified Mice using Staphylococcus aureus Cas9
Source: PubMed Central journal article supplement (PMC5009317; doi:10.1038/srep32565), 2016-09-02
Supplement: srep32565-s1.pdf [file srep32565-s1.pdf]

## **Supplementary information:**

Supplementary information Figures S1-S4 and Table S1-S5.

### **Efficient Production of Gene-Modified Mice using *Staphylococcus aureus* Cas9**

Xiya Zhang<sup>1,2,#</sup>, Puping Liang<sup>1,2,3,#</sup>, Chenhui Ding<sup>3,#</sup>, Zhen Zhang<sup>2</sup>, Jianwen Zhou<sup>4</sup>, Xiaowei Xie<sup>2</sup>, Rui Huang<sup>2</sup>, Ying Sun<sup>2</sup>, Hongwei Sun<sup>2</sup>, Jinran Zhang<sup>2</sup>, Yanwen Xu<sup>3</sup>, Zhou Songyang<sup>1,2,3,\*</sup>, Junjiu Huang<sup>1,2,3,\*</sup>

<sup>1</sup>State Key Laboratory of Ophthalmology, Zhongshan Ophthalmic Center, Sun Yat-sen University, Guangzhou, 510275, China.

<sup>2</sup>Key Laboratory of Gene Engineering of the Ministry of Education, Guangzhou Key Laboratory of Healthy Aging Research and State Key Laboratory of Biocontrol, SYSU-BCM Joint Research Center, School of Life Sciences, Sun Yat-sen University, Guangzhou, 510275, China

<sup>3</sup>Key Laboratory of Reproductive Medicine of Guangdong Province, School of Life Sciences and the First Affiliated Hospital, Sun Yat-sen University, Guangzhou, 510275, China

<sup>4</sup>Department of Pathology, First Affiliated Hospital, Sun Yat-sen University, Guangzhou, 510080, China

# Supplementary information, Figure S1

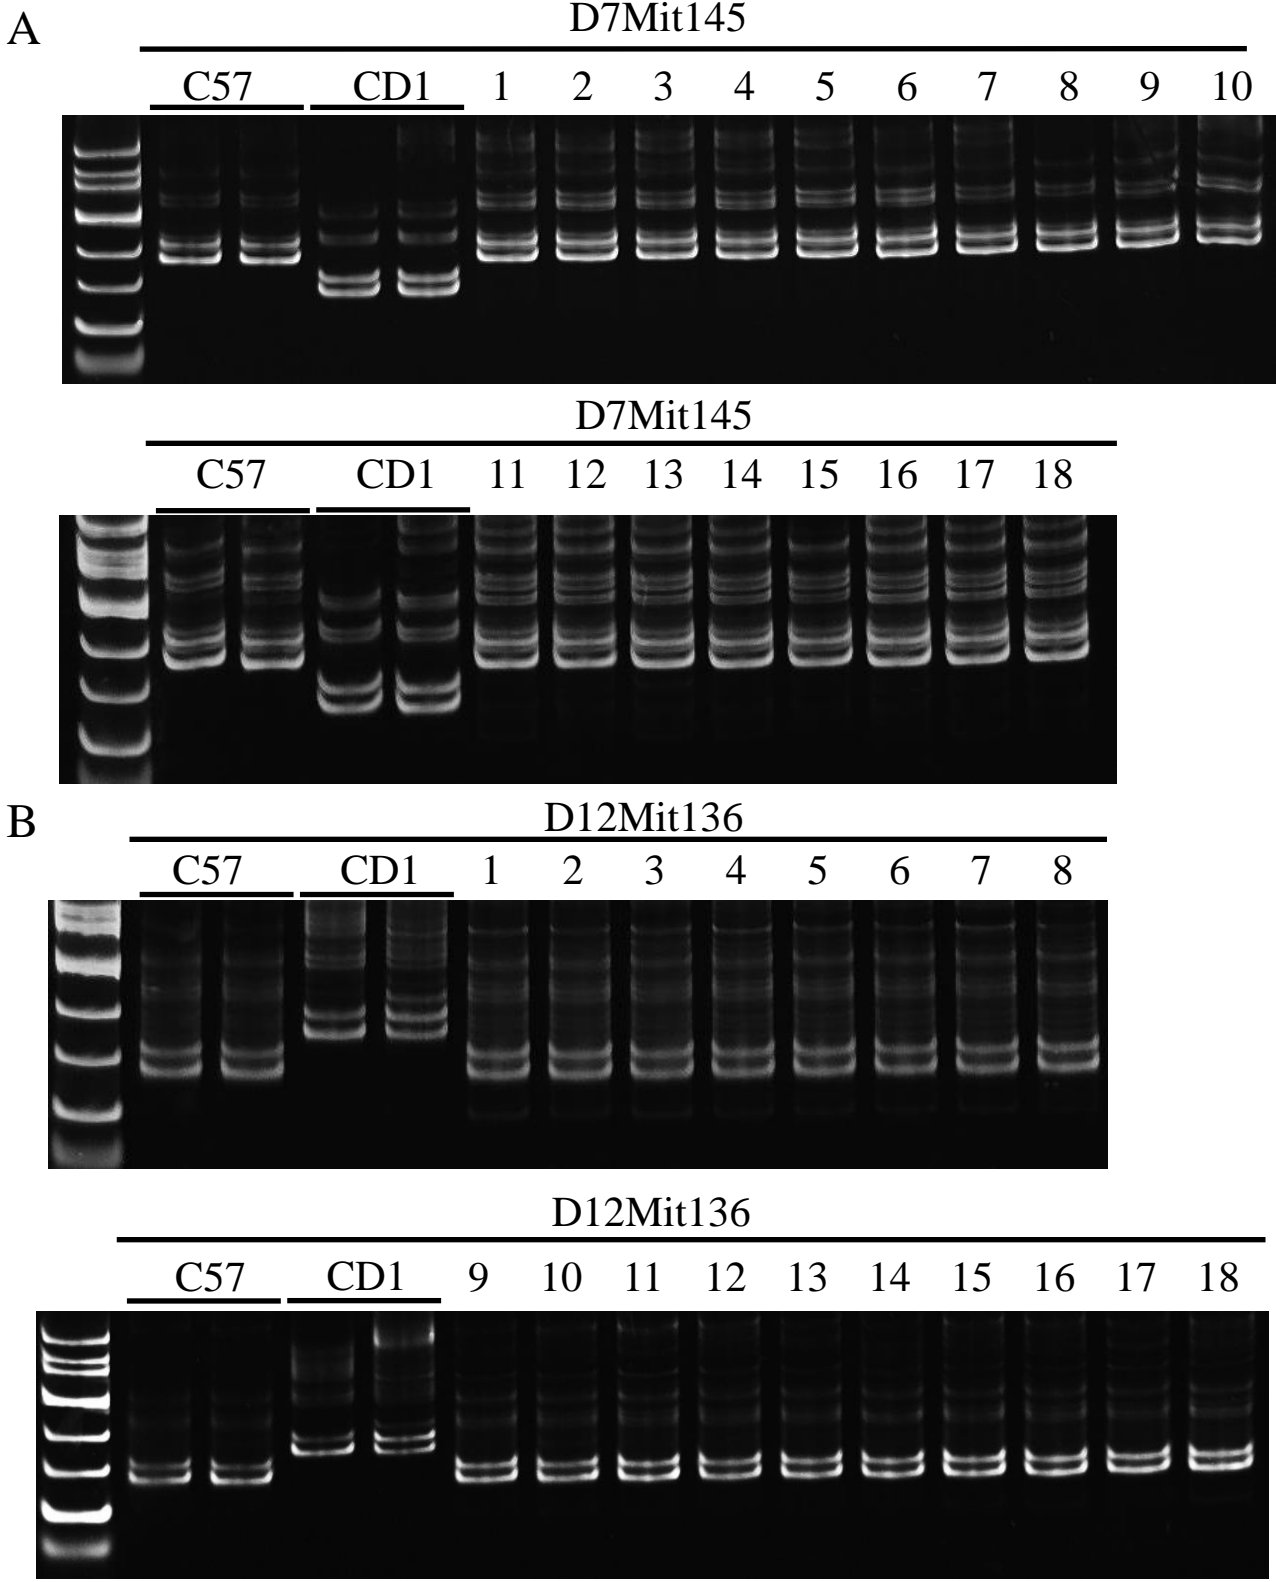

Microsatellite analysis confirmed that the albino and mosaic founders were C57BL/6J mice. (A) D7Mit145 sites, from albino and mosaic founders, were amplified by PCR and then electrophoresis on 10% PAGE gel. (B) Microsatellite analysis using D12Mit136 site to confirm the albino and mosaic founders were C57BL/6J.

# Supplementary information, Figure S2

## *Tyr-SaCas9-G1*

WT GTGATTTCTTCATAACATCCAAGGATCTGGGATATGACTACAGCTAC

#2  
GTGATTTCTTCATAACATCCAAGGA—TGGGATATGACTACAGCTAC  
GTGATTTCTTCATAACATCCAAG-----ATATGACTACAGCTAC  
GTGATTTCTTCATAACATCCAAGGATATGGGATATGGGATATGACTACAGCTAC  
GTGATTTCTTCATAACATCTGGG-----ATATGACTACAGCTAC  
GTGATTTCTTCATAACATCTGGGG-----TATGACTACAGCTAC

#4  
GTGATTTCTTCATAACATCCAAGGATCTGGGATATGACTACAGCTAC  
GTGATTTCTTCATAACATCCAATTATCTGGGATATGACTACAGCTAC  
GTGATTTCTTCATAACATCCA-----TGTATGACTACTATTAC  
GTGATTTCTTCATAACATCCA-----GGTATGACTACAGCTAC  
GTGATTTCTTCATAACATCCA-----GGATATGACTACAGCTAC  
GTGATTTCTTCATAACATCCA-----GGTATGACTACAGCTAC

## *Tyr-SaCas9-G2*

WT GTGATTTCTTCATAACATCCAAGGATCTGGGATATGACTACAGCTAC

#1  
GTGATTTCTTCATAAACATCCAAGGATCTGGGATATGACTACAGCTAC  
GTGATTTCTTCATAAACATC-----TGGGATATGACTACAGCTAC  
GTGATTTCTTCATAAACATCCAAGGATCTGGGATATGACTACAGCTAC  
GTGATTTCTTCATAAACATCCAAGGA—TGGGATATGACTACAGCTAC

#4  
GTGATTTCTTCATAACATCCAAGGATCTGGGATATGACTACAGCTAC  
GTGATTTCTTCATAACATCCAAGGAT-----ATGACTACAGCTAC

## *Tyr-SpCas9-G3*

WT TTACCCAGAAGCCAATGCACCTATCGGCCATAACAGAGACTCTT

#1  
TTACCCAGAAGCCAATCTGGGTATATCGGCCATAACAGAGACTCTTAC  
TTACCCAGAAGCC-----ATAACAGAGACTCTTAC  
TTACCCAGAAGCC-----TATCGGCCATAACAGAGACTCTTAC

#4  
TTACCCAGAAGCCA-----TAACAGAGACTCTTAC  
TTACCCAGAAGCCAAT-----CGGCCATAACAGAGACTCTTAC  
TTACCCAGAAGCCAAT-----CGGCAATAACAGACACGCTTAC  
TTACCCAGAAACCA-----TAACAGAGACTCTTAC

## *Tyr-SpCas9-G4*

WT TTACCCAGAAGCCAATGCACCTATCGGCCATAACAGAGACTCTTAC

#1  
TTACCCAGAAGCCAATGCACATATCTCATAAGGTACTCTTAC  
TTACCCAGAAGCCAATGCACCTATCG-----CCATAACAGAGACTCTTAC  
TTACCCAGAAGCCA-----TAACAGAGACTCTTAC

#3  
TTACCCAGAAGCCAATGCACCTAT-----AACAGAGACTCTTAC  
TTACCCAGAAGCCAATGCACCTATCGGCCATAACAGAGACTCTTAC  
TTACCCAGAAGCCAATGCACCTATC-----ACGGAACTCTTAC

The sequence of mutant alleles in *Tyr* mutant founders. PAM sequence and truncated PAM sequence are labeled in green. Mutant base is labeled in red, and inserted base is in purple.

## Supplementary information, Figure S3.

*Tyr*-SaCas9-G1

TGATTTCTTCATAACATCCAA GGAACGACTAAATCACCC

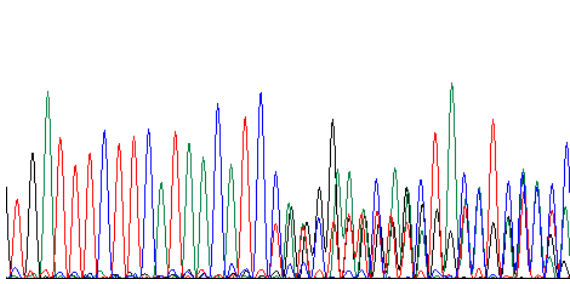

*Tyr*-SaCas9-G2

TGATTTCTTCATAACATCCAA G GACCTGGGATATGACTA

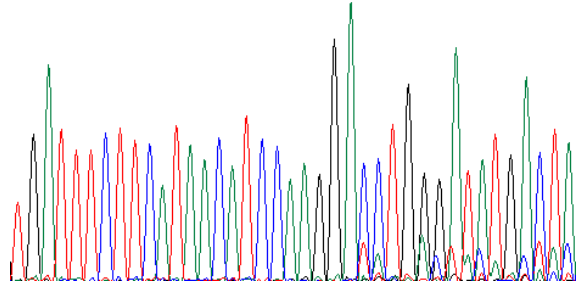

*Tyr*-SpCas9-G3

GAAGTTTACCCAG AAGCCCTACCATAGACTCTTACATGG

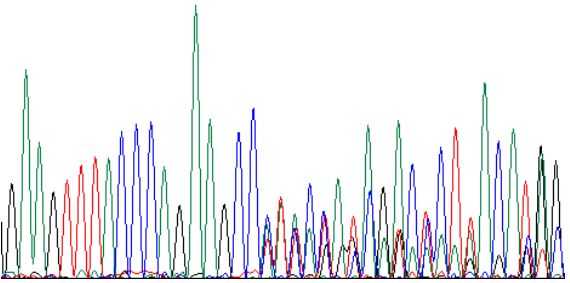

*Tyr*-SpCas9-G4

AGAAGCCAA TGCACCTATCGAGAGACTCTAACCTGGCTC

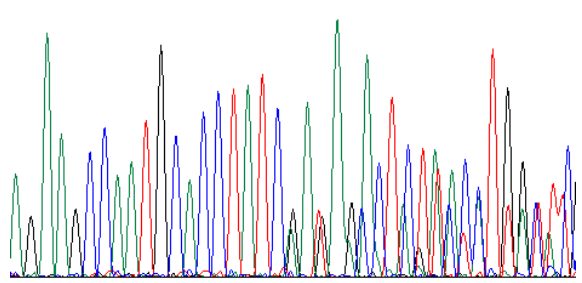

Sanger sequencing to confirm *Tyr* knock-out founder mice. Representative sequencing results showed double peaks near the PAM sequence of target sites.

Supplementary information, Figure S4.

A

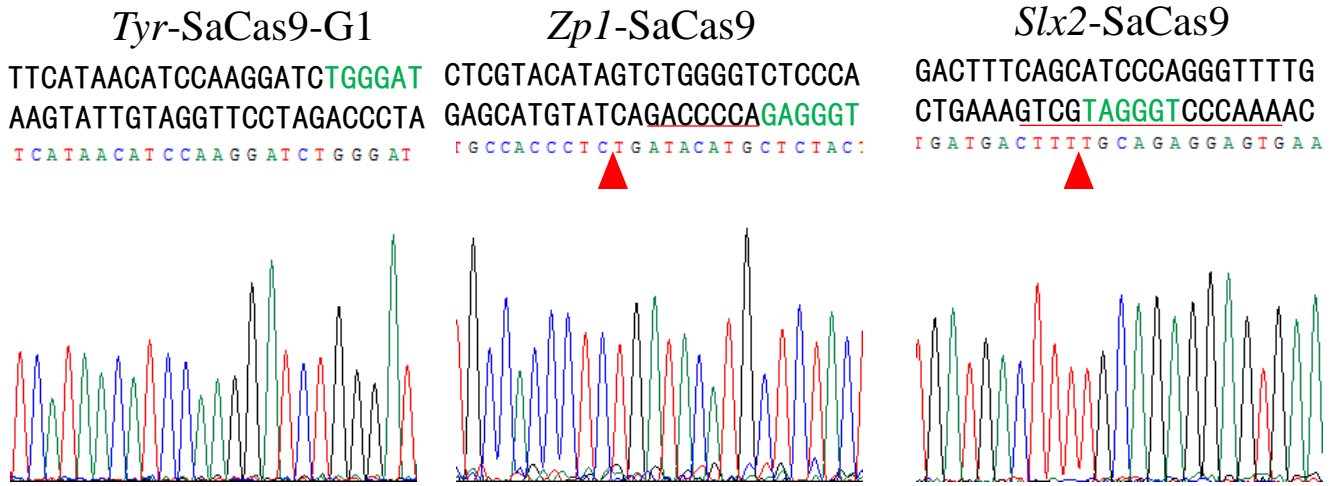

B

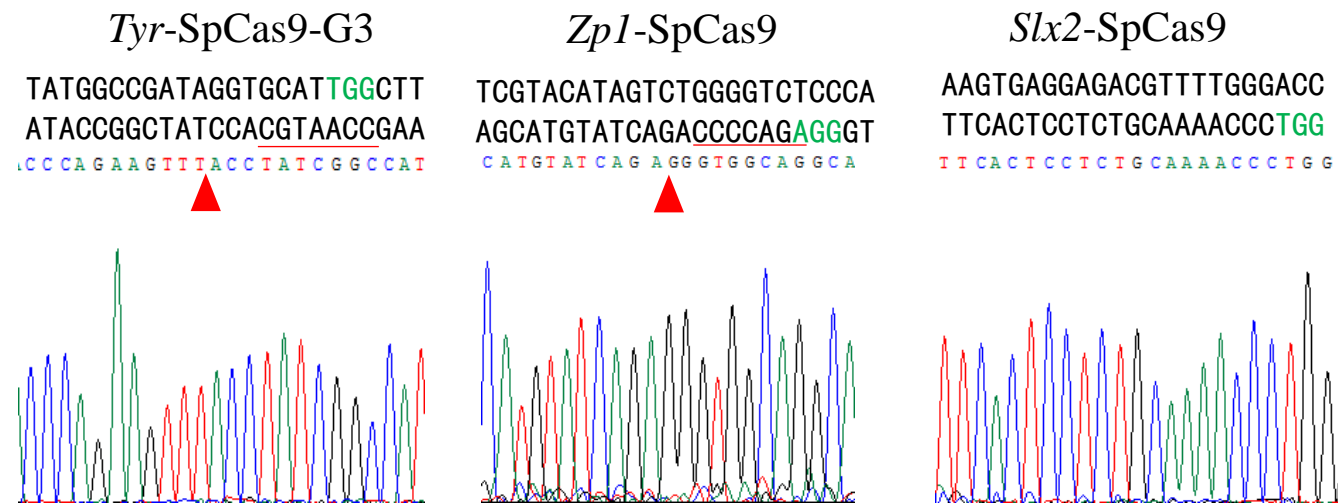

Sanger sequencing to confirm the genotype of multiplex targeted embryos. Sites where some base pairs are deleted are indicated by red triangle, and the deleted base pairs are underlined with red line.

(A) Sanger sequencing to confirm the genotype of #9 embryo of SaCas9.

(B) Sanger sequencing to confirm the genotype of #8 embryo of SpCas9.

## Supplementary information Table S1

Single gene disruption efficiency of multiplex gene disruption in mouse embryos by SaCas9 and SpCas9

|        | <i>Slx2</i> -targeted embryo No. (%) | <i>Zp1</i> -targeted embryo No. (%) | Tyr-targeted embryo No. (%) |
|--------|--------------------------------------|-------------------------------------|-----------------------------|
| SaCas9 | 17/30 (56.7%)                        | 27/30 (90%)                         | 23/30 (76.7%)               |
| SpCas9 | 5/37 (13.5%)                         | 29/37 (78.4%)                       | 14/37 (37.8%)               |

## Supplementary information Table S2

### Primers used for in vitro transcription of gRNA and saCas9 mRNA

|                     |                                                                          |
|---------------------|--------------------------------------------------------------------------|
| T7-saCas9-FP        | TAATACGACTCACTATAGGGAGAATGGCCCCAAAGAAGAAGC                               |
| T7-saCas9-RP        | TTAGGATCCCTTTTTCTTTTTTGC                                                 |
| SaCas9-gRNA-RP      | AAAAATCTCGCCAACAAGTT                                                     |
| SLX2-SaCas9-gRNA-FP | TGTAATACGACTCACTATAGGCCTTCACTCCTCTGCAAAACCCGT<br>TTTAGTACTCTGGAAACAGAATC |
| ZP1-SaCas9-gRNA-FP  | TGTAATACGACTCACTATAGGTAGAGCATGTATCAGACCCCAGTT<br>TTAGTACTCTGGAAACAGAATC  |
| Tyr-SaCas9-G1-FP    | TGTAATACGACTCACTATAGGTCTTCATAACATCCAAGGATCGTTTTAGTA<br>CTCTGGAAACAGAATC  |
| Tyr-SaCas9-G2-FP    | TGTAATACGACTCACTATAGGCTGTAGTCATATCCAGATCCGTTTTAGTA<br>CTCTGGAAACAGAATC   |
| SLX2-SpCas9-gRNA-FP | TAGGTTCACTCCTCTGCAAAACCC                                                 |
| SLX2-SpCas9-gRNA-RP | AAACGGGTTTTGCAGAGGAGTGAA                                                 |
| ZP1-SpCas9-gRNA-FP  | TAGGAGCATGTATCAGACCCCAG                                                  |
| ZP1-SpCas9-gRNA-RP  | AAACCTGGGGTCTGATACATGCT                                                  |
| Tyr-SpCas9-G3-FP    | TAGGTTATGGCCGATAGGTGCAT                                                  |
| Tyr-SpCas9-G3-RP    | AAACATGCACCTATCGGCCATAA                                                  |
| Tyr-SpCas9-G4-FP    | TAGGAGTCTCTGTTATGGCCGAT                                                  |
| Tyr-SpCas9-G4-RP    | AAACATCGGCCATAACAGAGACT                                                  |

## Supplementary information Table S3

### Primers used for single embryo PCR

|              |                           |
|--------------|---------------------------|
| ZP1-T7E1-FP  | CCTCTGCTCACCCACCTCT       |
| ZP1-T7E1-RP  | GCATCCTCAAAGCCCACT        |
| SLX2-T7E1-FP | CACCCCAACAGAGGAAGAAC      |
| SLX2-T7E1-RP | TTTCACAGACTTTTGGCAACTT    |
| Tyr-T7E1-FP  | ACACTACTTCTGATGAATGACCTT  |
| Tyr-T7E1-RP  | AAATTGGCATAATATAGTTTCTTTA |



## Supplementary information Table S4

### Primers used for microsatellite analysis

|              |                          |
|--------------|--------------------------|
| D7Mit145-FP  | CAGGTGACCTTGGTCATGG      |
| D7Mit145-RP  | AGAGCCCAGGGGTTTTAAGA     |
| D12Mit136-FP | TTTAATTTTGAGTGGGTTTGGC   |
| D12Mit136-RP | TTGCTACATGTACACTGATCTCCA |

## Supplementary information Table S5

### Primers for deep sequencing analysis of off-target sites

|                  |                                 |
|------------------|---------------------------------|
| ZP1-target-1-FP  | TAGATCGCAACTGTCTGGCCTCCAACC     |
| ZP1-target-1-RP  | CTCTCTATTGCTCACCCACCTCTCTCC     |
| ZP1-target-2-FP  | TATCCTCTAACTGTCTGGCCTCCAACC     |
| ZP1-target-2-RP  | AGAGTAGATGCTCACCCACCTCTCTCC     |
| ZP1-target-3-FP  | GTAAGGAGAACTGTCTGGCCTCCAACC     |
| ZP1-target-3-RP  | ACTGCATATGCTCACCCACCTCTCTCC     |
| ZP1-target-4-FP  | AAGGAGTAACTGTCTGGCCTCCAACC      |
| ZP1-target-4-RP  | CTAAGCCTTGCTCACCCACCTCTCTCC     |
| ZP1-target-5-FP  | CGTCTAATAACTGTCTGGCCTCCAACC     |
| ZP1-target-5-RP  | TCTCTCCGTGCTCACCCACCTCTCTCC     |
| ZP1-target-6-FP  | TCGACTAGAACTGTCTGGCCTCCAACC     |
| ZP1-target-6-RP  | TTCTAGCTTGCTCACCCACCTCTCTCC     |
| ZP1-target-7-FP  | CCTAGAGTAACTGTCTGGCCTCCAACC     |
| ZP1-target-7-RP  | GCGTAAGATGCTCACCCACCTCTCTCC     |
| ZP1-target-8-FP  | CTATTAAGAACTGTCTGGCCTCCAACC     |
| ZP1-target-8-RP  | AAGGCTATTGCTCACCCACCTCTCTCC     |
| ZP1-target-9-FP  | GAGCCTTAACTGTCTGGCCTCCAACC      |
| ZP1-target-9-RP  | TTATGCGATGCTCACCCACCTCTCTCC     |
| ZP1-target-10-FP | TCGCCTTAACTGTCTGGCCTCCAACC      |
| ZP1-target-10-RP | CTAGTACGTGCTCACCCACCTCTCTCC     |
|                  |                                 |
| ZP1-sp-OT1-1-FP  | TAGATCGCACAGCCAGGGCTATACAGAGAAA |
| ZP1-sp-OT1-1-RP  | CTCTCTATAAGAAAGAAAGAAAGAAAGCAA  |
| ZP1-sp-OT1-2-FP  | TATCCTCTACAGCCAGGGCTATACAGAGAAA |
| ZP1-sp-OT1-2-RP  | AGAGTAGAAAGAAAGAAAGAAAGAAAGCAA  |
| ZP1-sp-OT1-3-FP  | GTAAGGAGACAGCCAGGGCTATACAGAGAAA |
| ZP1-sp-OT1-3-RP  | ACTGCATAAAGAAAGAAAGAAAGAAAGCAA  |
| ZP1-sp-OT1-4-FP  | AAGGAGTAACAGCCAGGGCTATACAGAGAAA |
| ZP1-sp-OT1-4-RP  | CTAAGCCTAAGAAAGAAAGAAAGAAAGCAA  |
| ZP1-sp-OT1-5-FP  | CGTCTAATACAGCCAGGGCTATACAGAGAAA |
| ZP1-sp-OT1-5-RP  | TCTCTCCGAAGAAAGAAAGAAAGAAAGCAA  |
| ZP1-sp-OT1-6-FP  | TCGACTAGACAGCCAGGGCTATACAGAGAAA |
| ZP1-sp-OT1-6-RP  | TTCTAGCTAAGAAAGAAAGAAAGAAAGCAA  |
| ZP1-sp-OT1-7-FP  | CCTAGAGTACAGCCAGGGCTATACAGAGAAA |
| ZP1-sp-OT1-7-RP  | GCGTAAGAAAGAAAGAAAGAAAGAAAGCAA  |
| ZP1-sp-OT1-8-FP  | CTATTAAGACAGCCAGGGCTATACAGAGAAA |
| ZP1-sp-OT1-8-RP  | AAGGCTATAAGAAAGAAAGAAAGAAAGCAA  |
| ZP1-sp-OT1-9-FP  | GAGCCTTAACAGCCAGGGCTATACAGAGAAA |
| ZP1-sp-OT1-9-RP  | TTATGCGAAAGAAAGAAAGAAAGAAAGCAA  |
| ZP1-sp-OT1-10-FP | TCGCCTTAACAGCCAGGGCTATACAGAGAAA |
| ZP1-sp-OT1-10-RP | CTAGTACGAAGAAAGAAAGAAAGAAAGCAA  |
|                  |                                 |
| ZP1-sp-OT2-1-FP  | TAGATCGCTAAATTCCTGATGGCTGTCAATG |
| ZP1-sp-OT2-1-RP  | CTCTCTATAGTTCCTTCCAAAATAGCTTGCT |
| ZP1-sp-OT2-2-FP  | TATCCTCTTAAATTCCTGATGGCTGTCAATG |

ZP1-sp-OT2-2-RP AGAGTAGAAGTTCCTTCCAAAATAGCTTGCT  
ZP1-sp-OT2-3-FP GTAAGGAGTAAATTCCTGATGGCTGTCAATG  
ZP1-sp-OT2-3-RP ACTGCATAAGTTCCTTCCAAAATAGCTTGCT  
ZP1-sp-OT2-4-FP AAGGAGTATAAATTCCTGATGGCTGTCAATG  
ZP1-sp-OT2-4-RP CTAAGCCTAGTTCCTTCCAAAATAGCTTGCT  
ZP1-sp-OT2-5-FP CGTCTAATTAAATTCCTGATGGCTGTCAATG  
ZP1-sp-OT2-5-RP TCTCTCCGAGTTCCTTCCAAAATAGCTTGCT  
ZP1-sp-OT2-6-FP TCGACTAGTAAATTCCTGATGGCTGTCAATG  
ZP1-sp-OT2-6-RP TTCTAGCTAGTTCCTTCCAAAATAGCTTGCT  
ZP1-sp-OT2-7-FP CCTAGAGTTAAATTCCTGATGGCTGTCAATG  
ZP1-sp-OT2-7-RP GCGTAAGAAGTTCCTTCCAAAATAGCTTGCT  
ZP1-sp-OT2-8-FP CTATTAAGTAAATTCCTGATGGCTGTCAATG  
ZP1-sp-OT2-8-RP AAGGCTATAGTTCCTTCCAAAATAGCTTGCT  
ZP1-sp-OT2-9-FP GAGCCTTATAAATTCCTGATGGCTGTCAATG  
ZP1-sp-OT2-9-RP TTATGCGAAGTTCCTTCCAAAATAGCTTGCT  
ZP1-sp-OT2-10-FP TCGCCTTATAAATTCCTGATGGCTGTCAATG  
ZP1-sp-OT2-10-RP CTAGTACGAGTTCCTTCCAAAATAGCTTGCT

ZP1-sp-OT3-1-FP TAGATCGCTGACTTTGAGTTTTTCACTTATTCAC  
ZP1-sp-OT3-1-RP CTCTCTATACTAGGAGCTAACCTGCTATGTTG  
ZP1-sp-OT3-2-FP TATCCTCTTGACTTTGAGTTTTTCACTTATTCAC  
ZP1-sp-OT3-2-RP AGAGTAGACTAGGAGCTAACCTGCTATGTTG  
ZP1-sp-OT3-3-FP GTAAGGAGTGACTTTGAGTTTTTCACTTATTCAC  
ZP1-sp-OT3-3-RP ACTGCATACTAGGAGCTAACCTGCTATGTTG  
ZP1-sp-OT3-4-FP AAGGAGTATGACTTTGAGTTTTTCACTTATTCAC  
ZP1-sp-OT3-4-RP CTAAGCCTACTAGGAGCTAACCTGCTATGTTG  
ZP1-sp-OT3-5-FP CGTCTAATTGACTTTGAGTTTTTCACTTATTCAC  
ZP1-sp-OT3-5-RP TCTCTCCGACTAGGAGCTAACCTGCTATGTTG  
ZP1-sp-OT3-6-FP TCGACTAGTGACTTTGAGTTTTTCACTTATTCAC  
ZP1-sp-OT3-6-RP TTCTAGCTACTAGGAGCTAACCTGCTATGTTG  
ZP1-sp-OT3-7-FP CCTAGAGTTGACTTTGAGTTTTTCACTTATTCAC  
ZP1-sp-OT3-7-RP GCGTAAGACTAGGAGCTAACCTGCTATGTTG  
ZP1-sp-OT3-8-FP CTATTAAGTGACTTTGAGTTTTTCACTTATTCAC  
ZP1-sp-OT3-8-RP AAGGCTATACTAGGAGCTAACCTGCTATGTTG  
ZP1-sp-OT3-9-FP GAGCCTTATGACTTTGAGTTTTTCACTTATTCAC  
ZP1-sp-OT3-9-RP TTATGCGACTAGGAGCTAACCTGCTATGTTG  
ZP1-sp-OT3-10-FP TCGCCTTATGACTTTGAGTTTTTCACTTATTCAC  
ZP1-sp-OT3-10-RP CTAGTACGACTAGGAGCTAACCTGCTATGTTG

ZP1-sp-OT4-1-FP TAGATCGCGTGGAACAAGACTTGGTGTATC  
ZP1-sp-OT4-1-RP CTCTCTATGAATTCCTCTTCGTTCTAGGTGATA  
ZP1-sp-OT4-2-FP TATCCTCTGTGGAACAAGACTTGGTGTATC  
ZP1-sp-OT4-2-RP AGAGTAGAGAATTCCTCTTCGTTCTAGGTGATA  
ZP1-sp-OT4-3-FP GTAAGGAGGTGGAACAAGACTTGGTGTATC  
ZP1-sp-OT4-3-RP ACTGCATAGAATTCCTCTTCGTTCTAGGTGATA  
ZP1-sp-OT4-4-FP AAGGAGTAGTGGAACAAGACTTGGTGTATC  
ZP1-sp-OT4-4-RP CTAAGCCTGAATTCCTCTTCGTTCTAGGTGATA  
ZP1-sp-OT4-5-FP CGTCTAATGTGGAACAAGACTTGGTGTATC

ZP1-sp-OT4-5-RP TCTCTCCGGAATTCCTCTTCGTTCTAGGTGATA  
ZP1-sp-OT4-6-FP TCGACTAGGTGGAAACAAGACTTGGTGTATC  
ZP1-sp-OT4-6-RP TTCTAGCTGAATTCCTCTTCGTTCTAGGTGATA  
ZP1-sp-OT4-7-FP CCTAGAGTGTGGAAACAAGACTTGGTGTATC  
ZP1-sp-OT4-7-RP GCGTAAGAGAATTCCTCTTCGTTCTAGGTGATA  
ZP1-sp-OT4-8-FP CTATTAAGGTGGAAACAAGACTTGGTGTATC  
ZP1-sp-OT4-8-RP AAGGCTATGAATTCCTCTTCGTTCTAGGTGATA  
ZP1-sp-OT4-9-FP GAGCCTTAGTGGAAACAAGACTTGGTGTATC  
ZP1-sp-OT4-9-RP TTATGCGAGAATTCCTCTTCGTTCTAGGTGATA  
ZP1-sp-OT4-10-FP TCGCCTTAGTGGAAACAAGACTTGGTGTATC  
ZP1-sp-OT4-10-RP CTAGTACGGAATTCCTCTTCGTTCTAGGTGATA

ZP1-sp-OT5-1-FP TAGATCGCCATTAGTTCCCATCTCTGGTCCTT  
ZP1-sp-OT5-1-RP CTCTCTATGAAATCTGGTCGTTCAAGTTGA  
ZP1-sp-OT5-2-FP TATCCTCTCATTAGTTCCCATCTCTGGTCCTT  
ZP1-sp-OT5-2-RP AGAGTAGAGAAATCTGGTCGTTCAAGTTGA  
ZP1-sp-OT5-3-FP GTAAGGAGCATTAGTTCCCATCTCTGGTCCTT  
ZP1-sp-OT5-3-RP ACTGCATAGAAATCTGGTCGTTCAAGTTGA  
ZP1-sp-OT5-4-FP AAGGAGTACATTAGTTCCCATCTCTGGTCCTT  
ZP1-sp-OT5-4-RP CTAAGCCTGAAATCTGGTCGTTCAAGTTGA  
ZP1-sp-OT5-5-FP CGTCTAATCATTAGTTCCCATCTCTGGTCCTT  
ZP1-sp-OT5-5-RP TCTCTCCGGAATCTGGTCGTTCAAGTTGA  
ZP1-sp-OT5-6-FP TCGACTAGCATTAGTTCCCATCTCTGGTCCTT  
ZP1-sp-OT5-6-RP TTCTAGCTGAAATCTGGTCGTTCAAGTTGA  
ZP1-sp-OT5-7-FP CCTAGAGTCATTAGTTCCCATCTCTGGTCCTT  
ZP1-sp-OT5-7-RP GCGTAAGAGAAATCTGGTCGTTCAAGTTGA  
ZP1-sp-OT5-8-FP CTATTAAGCATTAGTTCCCATCTCTGGTCCTT  
ZP1-sp-OT5-8-RP AAGGCTATGAAATCTGGTCGTTCAAGTTGA  
ZP1-sp-OT5-9-FP GAGCCTTACATTAGTTCCCATCTCTGGTCCTT  
ZP1-sp-OT5-9-RP TTATGCGAGAATCTGGTCGTTCAAGTTGA  
ZP1-sp-OT5-10-FP TCGCCTTACATTAGTTCCCATCTCTGGTCCTT  
ZP1-sp-OT5-10-RP CTAGTACGGAATCTGGTCGTTCAAGTTGA

ZP1-sp-OT6-1-FP TAGATCGCAATGAGCACAGAGGAAATGTTTAT  
ZP1-sp-OT6-1-RP CTCTCTATCTTGGTTTTGTTCTTCAAAGTCTC  
ZP1-sp-OT6-2-FP TATCCTCTAATGAGCACAGAGGAAATGTTTAT  
ZP1-sp-OT6-2-RP AGAGTAGACTTGGTTTTGTTCTTCAAAGTCTC  
ZP1-sp-OT6-3-FP GTAAGGAGAATGAGCACAGAGGAAATGTTTAT  
ZP1-sp-OT6-3-RP ACTGCATACTTGGTTTTGTTCTTCAAAGTCTC  
ZP1-sp-OT6-4-FP AAGGAGTAAATGAGCACAGAGGAAATGTTTAT  
ZP1-sp-OT6-4-RP CTAAGCCTCTTGGTTTTGTTCTTCAAAGTCTC  
ZP1-sp-OT6-5-FP CGTCTAATAATGAGCACAGAGGAAATGTTTAT  
ZP1-sp-OT6-5-RP TCTCTCCGCTTGGTTTTGTTCTTCAAAGTCTC  
ZP1-sp-OT6-6-FP TCGACTAGAATGAGCACAGAGGAAATGTTTAT  
ZP1-sp-OT6-6-RP TTCTAGCTCTTGGTTTTGTTCTTCAAAGTCTC  
ZP1-sp-OT6-7-FP CCTAGAGTAATGAGCACAGAGGAAATGTTTAT  
ZP1-sp-OT6-7-RP GCGTAAGACTTGGTTTTGTTCTTCAAAGTCTC  
ZP1-sp-OT6-8-FP CTATTAAGAATGAGCACAGAGGAAATGTTTAT

ZP1-sp-OT6-8-RP AAGGCTATCTTGGTTTTGTTCTTCAAAGTCTC  
ZP1-sp-OT6-9-FP GAGCCTTAAATGAGCACAGAGGAAATGTTTAT  
ZP1-sp-OT6-9-RP TTATGCGACTTGGTTTTGTTCTTCAAAGTCTC  
ZP1-sp-OT6-10-FP TCGCCTTAAATGAGCACAGAGGAAATGTTTAT  
ZP1-sp-OT6-10-RP CTAGTACGCTTGGTTTTGTTCTTCAAAGTCTC

ZP1-sp-OT7-1-FP TAGATCGCTGCCAGTATGTAAATGGGTTCTAT  
ZP1-sp-OT7-1-RP CTCTCTATACTGTCTTTCAGTGTGAGCCAAG  
ZP1-sp-OT7-2-FP TATCCTCTTGCCAGTATGTAAATGGGTTCTAT  
ZP1-sp-OT7-2-RP AGAGTAGAACTGTCTTTCAGTGTGAGCCAAG  
ZP1-sp-OT7-3-FP GTAAGGAGTGCCAGTATGTAAATGGGTTCTAT  
ZP1-sp-OT7-3-RP ACTGCATAACTGTCTTTCAGTGTGAGCCAAG  
ZP1-sp-OT7-4-FP AAGGAGTATGCCAGTATGTAAATGGGTTCTAT  
ZP1-sp-OT7-4-RP CTAAGCCTACTGTCTTTCAGTGTGAGCCAAG  
ZP1-sp-OT7-5-FP CGTCTAATTGCCAGTATGTAAATGGGTTCTAT  
ZP1-sp-OT7-5-RP TCTCTCCGACTGTCTTTCAGTGTGAGCCAAG  
ZP1-sp-OT7-6-FP TCGACTAGTGCCAGTATGTAAATGGGTTCTAT  
ZP1-sp-OT7-6-RP TTCTAGCTACTGTCTTTCAGTGTGAGCCAAG  
ZP1-sp-OT7-7-FP CCTAGAGTTGCCAGTATGTAAATGGGTTCTAT  
ZP1-sp-OT7-7-RP GCGTAAGAACTGTCTTTCAGTGTGAGCCAAG  
ZP1-sp-OT7-8-FP CTATTAAGTGCCAGTATGTAAATGGGTTCTAT  
ZP1-sp-OT7-8-RP AAGGCTATACTGTCTTTCAGTGTGAGCCAAG  
ZP1-sp-OT7-9-FP GAGCCTTATGCCAGTATGTAAATGGGTTCTAT  
ZP1-sp-OT7-9-RP TTATGCGAACTGTCTTTCAGTGTGAGCCAAG  
ZP1-sp-OT7-10-FP TCGCCTTATGCCAGTATGTAAATGGGTTCTAT  
ZP1-sp-OT7-10-RP CTAGTACGACTGTCTTTCAGTGTGAGCCAAG

ZP1-sp-OT8-1-FP TAGATCGCCATCACCCCAATAGATGTTTATGC  
ZP1-sp-OT8-1-RP CTCTCTATGGTCATTTGTGAAGTGTTTTGTCC  
ZP1-sp-OT8-2-FP TATCCTCTCATCACCCCAATAGATGTTTATGC  
ZP1-sp-OT8-2-RP AGAGTAGAGGTCATTTGTGAAGTGTTTTGTCC  
ZP1-sp-OT8-3-FP GTAAGGAGCATCACCCCAATAGATGTTTATGC  
ZP1-sp-OT8-3-RP ACTGCATAGGTCATTTGTGAAGTGTTTTGTCC  
ZP1-sp-OT8-4-FP AAGGAGTACATCACCCCAATAGATGTTTATGC  
ZP1-sp-OT8-4-RP CTAAGCCTGGTCATTTGTGAAGTGTTTTGTCC  
ZP1-sp-OT8-5-FP CGTCTAATCATCACCCCAATAGATGTTTATGC  
ZP1-sp-OT8-5-RP TCTCTCCGGGTCATTTGTGAAGTGTTTTGTCC  
ZP1-sp-OT8-6-FP TCGACTAGCATCACCCCAATAGATGTTTATGC  
ZP1-sp-OT8-6-RP TTCTAGCTGGTCATTTGTGAAGTGTTTTGTCC  
ZP1-sp-OT8-7-FP CCTAGAGTCATCACCCCAATAGATGTTTATGC  
ZP1-sp-OT8-7-RP GCGTAAGAGGTCATTTGTGAAGTGTTTTGTCC  
ZP1-sp-OT8-8-FP CTATTAAGCATCACCCCAATAGATGTTTATGC  
ZP1-sp-OT8-8-RP AAGGCTATGGTCATTTGTGAAGTGTTTTGTCC  
ZP1-sp-OT8-9-FP GAGCCTTACATCACCCCAATAGATGTTTATGC  
ZP1-sp-OT8-9-RP TTATGCGAGGTCATTTGTGAAGTGTTTTGTCC  
ZP1-sp-OT8-10-FP TCGCCTTACATCACCCCAATAGATGTTTATGC  
ZP1-sp-OT8-10-RP CTAGTACGGGTCATTTGTGAAGTGTTTTGTCC

ZP1-sp-OT9-1-FP TAGATCGCTTAACTTAGCTGCATTCTGCTTCC  
ZP1-sp-OT9-1-RP CTCTCTATCTTCATCTTTTGGCTCACTTTTCA  
ZP1-sp-OT9-2-FP TATCCTCTTTAACTTAGCTGCATTCTGCTTCC  
ZP1-sp-OT9-2-RP AGAGTAGACTTCATCTTTTGGCTCACTTTTCA  
ZP1-sp-OT9-3-FP GTAAGGAGTTAACTTAGCTGCATTCTGCTTCC  
ZP1-sp-OT9-3-RP ACTGCATACTTCATCTTTTGGCTCACTTTTCA  
ZP1-sp-OT9-4-FP AAGGAGTATTAACCTTAGCTGCATTCTGCTTCC  
ZP1-sp-OT9-4-RP CTAAGCCTCTTCATCTTTTGGCTCACTTTTCA  
ZP1-sp-OT9-5-FP CGTCTAATTTAACTTAGCTGCATTCTGCTTCC  
ZP1-sp-OT9-5-RP TCTCTCCGCTTCATCTTTTGGCTCACTTTTCA  
ZP1-sp-OT9-6-FP TCGACTAGTTAACTTAGCTGCATTCTGCTTCC  
ZP1-sp-OT9-6-RP TTCTAGCTCTTCATCTTTTGGCTCACTTTTCA  
ZP1-sp-OT9-7-FP CCTAGAGTTTAACTTAGCTGCATTCTGCTTCC  
ZP1-sp-OT9-7-RP GCGTAAGACTTCATCTTTTGGCTCACTTTTCA  
ZP1-sp-OT9-8-FP CTATTAAGTTAACTTAGCTGCATTCTGCTTCC  
ZP1-sp-OT9-8-RP AAGGCTATCTTCATCTTTTGGCTCACTTTTCA  
ZP1-sp-OT9-9-FP GAGCCTTATTAACCTTAGCTGCATTCTGCTTCC  
ZP1-sp-OT9-9-RP TTATGCGACTTCATCTTTTGGCTCACTTTTCA  
ZP1-sp-OT9-10-FP TCGCCTTATTAACCTTAGCTGCATTCTGCTTCC  
ZP1-sp-OT9-10-RP CTAGTACGCTTCATCTTTTGGCTCACTTTTCA

ZP1-sp-OT10-1-FP TAGATCGCCAGAATTTAAACAGGGGAGGAA  
ZP1-sp-OT10-1-RP CTCTCTATCAAAAACAAAACACAGGGGAC  
ZP1-sp-OT10-2-FP TATCCTCTCAGAATTTAAACAGGGGAGGAA  
ZP1-sp-OT10-2-RP AGAGTAGACAAAACAAAACACAGGGGAC  
ZP1-sp-OT10-3-FP GTAAGGAGCAGAATTTAAACAGGGGAGGAA  
ZP1-sp-OT10-3-RP ACTGCATACAAAACAAAACACAGGGGAC  
ZP1-sp-OT10-4-FP AAGGAGTACAGAATTTAAACAGGGGAGGAA  
ZP1-sp-OT10-4-RP CTAAGCCTCAAAAACAAAACACAGGGGAC  
ZP1-sp-OT10-5-FP CGTCTAATCAGAATTTAAACAGGGGAGGAA  
ZP1-sp-OT10-5-RP TCTCTCCGCAAAAACAAAACACAGGGGAC  
ZP1-sp-OT10-6-FP TCGACTAGCAGAATTTAAACAGGGGAGGAA  
ZP1-sp-OT10-6-RP TTCTAGCTCAAAAACAAAACACAGGGGAC  
ZP1-sp-OT10-7-FP CCTAGAGTCAGAATTTAAACAGGGGAGGAA  
ZP1-sp-OT10-7-RP GCGTAAGACAAAACAAAACACAGGGGAC  
ZP1-sp-OT10-8-FP CTATTAAGCAGAATTTAAACAGGGGAGGAA  
ZP1-sp-OT10-8-RP AAGGCTATCAAAAACAAAACACAGGGGAC  
ZP1-sp-OT10-9-FP GAGCCTTACAGAATTTAAACAGGGGAGGAA  
ZP1-sp-OT10-9-RP TTATGCGACAAAACAAAACACAGGGGAC  
ZP1-sp-OT10-10-FP TCGCCTTACAGAATTTAAACAGGGGAGGAA  
ZP1-sp-OT10-10-RP CTAGTACGCAAAAACAAAACACAGGGGAC

ZP1-target-11-FP TTCTGCCTAACTGTCTGGCCTCCAACC  
ZP1-target-11-RP GCTCAGGATGCTCACCCACCTCTCTCC  
ZP1-target-12-FP AGGAGTCCAAGTGTCTGGCCTCCAACC  
ZP1-target-12-RP CATGCCTATGCTCACCCACCTCTCTCC  
ZP1-target-13-FP GTAGAGAGAACTGTCTGGCCTCCAACC  
ZP1-target-13-RP CCTCTCTGTGCTCACCCACCTCTCTCC

ZP1-target-14-FP AGCGTAGCAACTGTCTGGCCTCCAACC  
ZP1-target-14-RP CAGCCTCGTGCTCACCCACCTCTCTCC  
ZP1-target-15-FP TGCCTCTTAACTGTCTGGCCTCCAACC  
ZP1-target-15-RP TCCTCTACTGCTCACCCACCTCTCTCC  
ZP1-target-16-FP TCATGAGCAACTGTCTGGCCTCCAACC  
ZP1-target-16-RP CCTGAGATTGCTCACCCACCTCTCTCC  
ZP1-target-17-FP TAGCGAGTAACTGTCTGGCCTCCAACC  
ZP1-target-17-RP GTAGCTCCTGCTCACCCACCTCTCTCC  
ZP1-target-18-FP TACTACGCAACTGTCTGGCCTCCAACC  
ZP1-target-18-RP AGGCTCCGTGCTCACCCACCTCTCTCC  
ZP1-target-19-FP GCAGCGTAAACTGTCTGGCCTCCAACC  
ZP1-target-19-RP CTGCGCATTGCTCACCCACCTCTCTCC  
ZP1-target-20-FP GAGCGCTAAACTGTCTGGCCTCCAACC  
ZP1-target-20-RP CGCTCAGTTGCTCACCCACCTCTCTCC

ZP1-sa-OT1-11-FP TTCTGCCTCCTTTGAAGGGTGTGTCAGGAAA  
ZP1-sa-OT1-11-RP GCTCAGGAGCTGGCATCGGGTATCGT  
ZP1-sa-OT1-12-FP AGGAGTCCCCTTTGAAGGGTGTGTCAGGAAA  
ZP1-sa-OT1-12-RP CATGCCTAGCTGGCATCGGGTATCGT  
ZP1-sa-OT1-13-FP GTAGAGAGCCTTTGAAGGGTGTGTCAGGAAA  
ZP1-sa-OT1-13-RP CCTCTCTGGCTGGCATCGGGTATCGT  
ZP1-sa-OT1-14-FP AGCGTAGCCCTTTGAAGGGTGTGTCAGGAAA  
ZP1-sa-OT1-14-RP CAGCCTCGGCTGGCATCGGGTATCGT  
ZP1-sa-OT1-15-FP TGCCTCTTCCTTTGAAGGGTGTGTCAGGAAA  
ZP1-sa-OT1-15-RP TCCTCTACGCTGGCATCGGGTATCGT  
ZP1-sa-OT1-16-FP TCATGAGCCCTTTGAAGGGTGTGTCAGGAAA  
ZP1-sa-OT1-16-RP CCTGAGATGCTGGCATCGGGTATCGT  
ZP1-sa-OT1-17-FP TAGCGAGTCCTTTGAAGGGTGTGTCAGGAAA  
ZP1-sa-OT1-17-RP GTAGCTCCGCTGGCATCGGGTATCGT  
ZP1-sa-OT1-18-FP TACTACGCCCTTTGAAGGGTGTGTCAGGAAA  
ZP1-sa-OT1-18-RP AGGCTCCGGCTGGCATCGGGTATCGT  
ZP1-sa-OT1-19-FP GCAGCGTACCTTTGAAGGGTGTGTCAGGAAA  
ZP1-sa-OT1-19-RP CTGCGCATGCTGGCATCGGGTATCGT  
ZP1-sa-OT1-20-FP GAGCGCTACCTTTGAAGGGTGTGTCAGGAAA  
ZP1-sa-OT1-20-RP CGCTCAGTGCTGGCATCGGGTATCGT

ZP1-sa-OT2-11-FP TTCTGCCTTTTTGTTTATTGCCTTTCAGC  
ZP1-sa-OT2-11-RP GCTCAGGAAATGGAGGGGTAGTGGTTTG  
ZP1-sa-OT2-12-FP AGGAGTCCTTTGTTTATTGCCTTTCAGC  
ZP1-sa-OT2-12-RP CATGCCTAAATGGAGGGGTAGTGGTTTG  
ZP1-sa-OT2-13-FP GTAGAGAGTTTGTGTTTATTGCCTTTCAGC  
ZP1-sa-OT2-13-RP CCTCTCTGAATGGAGGGGTAGTGGTTTG  
ZP1-sa-OT2-14-FP AGCGTAGCTTTGTTTATTGCCTTTCAGC  
ZP1-sa-OT2-14-RP CAGCCTCGAATGGAGGGGTAGTGGTTTG  
ZP1-sa-OT2-15-FP TGCCTCTTTTTGTTTATTGCCTTTCAGC  
ZP1-sa-OT2-15-RP TCCTCTACAATGGAGGGGTAGTGGTTTG  
ZP1-sa-OT2-16-FP TCATGAGCTTTGTTTATTGCCTTTCAGC  
ZP1-sa-OT2-16-RP CCTGAGATAATGGAGGGGTAGTGGTTTG

ZP1-sa-OT2-17-FP TAGCGAGTTTTGTTTATTGCCTTTCAGC  
 ZP1-sa-OT2-17-RP GTAGCTCCAATGGAGGGGTAGTGGTTTG  
 ZP1-sa-OT2-18-FP TACTACGCTTTGTTTATTGCCTTTCAGC  
 ZP1-sa-OT2-18-RP AGGCTCCGAATGGAGGGGTAGTGGTTTG  
 ZP1-sa-OT2-19-FP GCAGCGTATTTGTTTATTGCCTTTCAGC  
 ZP1-sa-OT2-19-RP CTGCGCATAATGGAGGGGTAGTGGTTTG  
 ZP1-sa-OT2-20-FP GAGCGCTATTTGTTTATTGCCTTTCAGC  
 ZP1-sa-OT2-20-RP CGCTCAGTAATGGAGGGGTAGTGGTTTG

ZP1-sa-OT3-11-FP TTCTGCCTCCTTGTGAATGAGGTTGAATGT  
 ZP1-sa-OT3-11-RP GCTCAGGAAAGTGTCTTGTTTCCTCCTTTG  
 ZP1-sa-OT3-12-FP AGGAGTCCCCTTGTGAATGAGGTTGAATGT  
 ZP1-sa-OT3-12-RP CATGCCTAAAGTGTCTTGTTTCCTCCTTTG  
 ZP1-sa-OT3-13-FP GTAGAGAGCCTTGTGAATGAGGTTGAATGT  
 ZP1-sa-OT3-13-RP CCTCTCTGAAGTGTCTTGTTTCCTCCTTTG  
 ZP1-sa-OT3-14-FP AGCGTAGCCCTTGTGAATGAGGTTGAATGT  
 ZP1-sa-OT3-14-RP CAGCCTCGAAGTGTCTTGTTTCCTCCTTTG  
 ZP1-sa-OT3-15-FP TGCCTCTTCCTTGTGAATGAGGTTGAATGT  
 ZP1-sa-OT3-15-RP TCCTCTACAAGTGTCTTGTTTCCTCCTTTG  
 ZP1-sa-OT3-16-FP TCATGAGCCCTTGTGAATGAGGTTGAATGT  
 ZP1-sa-OT3-16-RP CCTGAGATAAGTGTCTTGTTTCCTCCTTTG  
 ZP1-sa-OT3-17-FP TAGCGAGTCCTTGTGAATGAGGTTGAATGT  
 ZP1-sa-OT3-17-RP GTAGCTCCAAGTGTCTTGTTTCCTCCTTTG  
 ZP1-sa-OT3-18-FP TACTACGCCCTTGTGAATGAGGTTGAATGT  
 ZP1-sa-OT3-18-RP AGGCTCCGAAGTGTCTTGTTTCCTCCTTTG  
 ZP1-sa-OT3-19-FP GCAGCGTACCTTGTGAATGAGGTTGAATGT  
 ZP1-sa-OT3-19-RP CTGCGCATAAGTGTCTTGTTTCCTCCTTTG  
 ZP1-sa-OT3-20-FP GAGCGCTACCTTGTGAATGAGGTTGAATGT  
 ZP1-sa-OT3-20-RP CGCTCAGTAAGTGTCTTGTTTCCTCCTTTG

ZP1-sa-OT4-11-FP TTCTGCCTCATCTCCACATAAGGAGACAAA  
 ZP1-sa-OT4-11-RP GCTCAGGATTTCCCTTTCTGAAGATTTACC  
 ZP1-sa-OT4-12-FP AGGAGTCCCATCTCCACATAAGGAGACAAA  
 ZP1-sa-OT4-12-RP CATGCCTATTTCCCTTTCTGAAGATTTACC  
 ZP1-sa-OT4-13-FP GTAGAGAGCATCTCCACATAAGGAGACAAA  
 ZP1-sa-OT4-13-RP CCTCTCTGTTTCCCTTTCTGAAGATTTACC  
 ZP1-sa-OT4-14-FP AGCGTAGCCATCTCCACATAAGGAGACAAA  
 ZP1-sa-OT4-14-RP CAGCCTCGTTTCCCTTTCTGAAGATTTACC  
 ZP1-sa-OT4-15-FP TGCCTCTTCATCTCCACATAAGGAGACAAA  
 ZP1-sa-OT4-15-RP TCCTCTACTTTCCCTTTCTGAAGATTTACC  
 ZP1-sa-OT4-16-FP TCATGAGCCATCTCCACATAAGGAGACAAA  
 ZP1-sa-OT4-16-RP CCTGAGATTTTCCCTTTCTGAAGATTTACC  
 ZP1-sa-OT4-17-FP TAGCGAGTCATCTCCACATAAGGAGACAAA  
 ZP1-sa-OT4-17-RP GTAGCTCCTTTCCCTTTCTGAAGATTTACC  
 ZP1-sa-OT4-18-FP TACTACGCCATCTCCACATAAGGAGACAAA  
 ZP1-sa-OT4-18-RP AGGCTCCGTTTCCCTTTCTGAAGATTTACC  
 ZP1-sa-OT4-19-FP GCAGCGTACATCTCCACATAAGGAGACAAA  
 ZP1-sa-OT4-19-RP CTGCGCATTTTCCCTTTCTGAAGATTTACC



ZP1-sa-OT4-20-FP GAGCGCTACATCTCCACATAAGGAGACAAA  
 ZP1-sa-OT4-20-RP CGCTCAGTTTTCCCTTTCTGAAGATTTACC

ZP1-sa-OT5-11-FP TTCTGCCTCAGGCAGATAGCAAGTTCAAGG  
 ZP1-sa-OT5-11-RP GCTCAGGAACCAGCAAACACGAGTCAGATAA  
 ZP1-sa-OT5-12-FP AGGAGTCCCAGGCAGATAGCAAGTTCAAGG  
 ZP1-sa-OT5-12-RP CATGCCTAACCAGCAAACACGAGTCAGATAA  
 ZP1-sa-OT5-13-FP GTAGAGAGCAGGCAGATAGCAAGTTCAAGG  
 ZP1-sa-OT5-13-RP CCTCTCTGACCAGCAAACACGAGTCAGATAA  
 ZP1-sa-OT5-14-FP AGCGTAGCCAGGCAGATAGCAAGTTCAAGG  
 ZP1-sa-OT5-14-RP CAGCCTCGACCAGCAAACACGAGTCAGATAA  
 ZP1-sa-OT5-15-FP TGCCTCTTCAGGCAGATAGCAAGTTCAAGG  
 ZP1-sa-OT5-15-RP TCCTCTACACCAGCAAACACGAGTCAGATAA  
 ZP1-sa-OT5-16-FP TCATGAGCCAGGCAGATAGCAAGTTCAAGG  
 ZP1-sa-OT5-16-RP CCTGAGATAACCAGCAAACACGAGTCAGATAA  
 ZP1-sa-OT5-17-FP TAGCGAGTCAGGCAGATAGCAAGTTCAAGG  
 ZP1-sa-OT5-17-RP GTAGCTCCACCAGCAAACACGAGTCAGATAA  
 ZP1-sa-OT5-18-FP TACTACGCCAGGCAGATAGCAAGTTCAAGG  
 ZP1-sa-OT5-18-RP AGGCTCCGACCAGCAAACACGAGTCAGATAA  
 ZP1-sa-OT5-19-FP GCAGCGTACAGGCAGATAGCAAGTTCAAGG  
 ZP1-sa-OT5-19-RP CTGCGCATAACCAGCAAACACGAGTCAGATAA  
 ZP1-sa-OT5-20-FP GAGCGCTACAGGCAGATAGCAAGTTCAAGG  
 ZP1-sa-OT5-20-RP CGCTCAGTACCAGCAAACACGAGTCAGATAA

ZP1-sa-OT6-11-FP TTCTGCCTCCAGGTTTCTAGTGCCAAGTCA  
 ZP1-sa-OT6-11-RP GCTCAGGAAACAGGTTATGAAAAGCGGACA  
 ZP1-sa-OT6-12-FP AGGAGTCCCCAGGTTTCTAGTGCCAAGTCA  
 ZP1-sa-OT6-12-RP CATGCCTAACAGGTTATGAAAAGCGGACA  
 ZP1-sa-OT6-13-FP GTAGAGAGCCAGGTTTCTAGTGCCAAGTCA  
 ZP1-sa-OT6-13-RP CCTCTCTGAACAGGTTATGAAAAGCGGACA  
 ZP1-sa-OT6-14-FP AGCGTAGCCCAGGTTTCTAGTGCCAAGTCA  
 ZP1-sa-OT6-14-RP CAGCCTCGAACAGGTTATGAAAAGCGGACA  
 ZP1-sa-OT6-15-FP TGCCTCTTCCAGGTTTCTAGTGCCAAGTCA  
 ZP1-sa-OT6-15-RP TCCTCTACAACAGGTTATGAAAAGCGGACA  
 ZP1-sa-OT6-16-FP TCATGAGCCCAGGTTTCTAGTGCCAAGTCA  
 ZP1-sa-OT6-16-RP CCTGAGATAACAGGTTATGAAAAGCGGACA  
 ZP1-sa-OT6-17-FP TAGCGAGTCCAGGTTTCTAGTGCCAAGTCA  
 ZP1-sa-OT6-17-RP GTAGCTCCAACAGGTTATGAAAAGCGGACA  
 ZP1-sa-OT6-18-FP TACTACGCCAGGTTTCTAGTGCCAAGTCA  
 ZP1-sa-OT6-18-RP AGGCTCCGAACAGGTTATGAAAAGCGGACA  
 ZP1-sa-OT6-19-FP GCAGCGTACCAGGTTTCTAGTGCCAAGTCA  
 ZP1-sa-OT6-19-RP CTGCGCATAACAGGTTATGAAAAGCGGACA  
 ZP1-sa-OT6-20-FP GAGCGTACCAGGTTTCTAGTGCCAAGTCA  
 ZP1-sa-OT6-20-RP CGCTCAGTAACAGGTTATGAAAAGCGGACA

ZP1-sa-OT7-11-FP TTCTGCCTTAGACACCACGCAACCACC  
 ZP1-sa-OT7-11-RP GCTCAGGATCCAAAGGTTTGTTCATCAG  
 ZP1-sa-OT7-12-FP AGGAGTCTTAGACACCACGCAACCACC

ZP1-sa-OT7-12-RP CATGCCTATCCAAAGGGTTTGTTCATCAG  
 ZP1-sa-OT7-13-FP GTAGAGAGTAGACACCACGCAACCACC  
 ZP1-sa-OT7-13-RP CCTCTCTGTCCAAAGGGTTTGTTCATCAG  
 ZP1-sa-OT7-14-FP AGCGTAGCTAGACACCACGCAACCACC  
 ZP1-sa-OT7-14-RP CAGCCTCGTCCAAAGGGTTTGTTCATCAG  
 ZP1-sa-OT7-15-FP TGCCTCTTTAGACACCACGCAACCACC  
 ZP1-sa-OT7-15-RP TCCTCTACTCCAAAGGGTTTGTTCATCAG  
 ZP1-sa-OT7-16-FP TCATGAGCTAGACACCACGCAACCACC  
 ZP1-sa-OT7-16-RP CCTGAGATTCCAAAGGGTTTGTTCATCAG  
 ZP1-sa-OT7-17-FP TAGCGAGTTAGACACCACGCAACCACC  
 ZP1-sa-OT7-17-RP GTAGCTCCTCCAAAGGGTTTGTTCATCAG  
 ZP1-sa-OT7-18-FP TACTACGCTAGACACCACGCAACCACC  
 ZP1-sa-OT7-18-RP AGGCTCCGTCCAAAGGGTTTGTTCATCAG  
 ZP1-sa-OT7-19-FP GCAGCGTATAGACACCACGCAACCACC  
 ZP1-sa-OT7-19-RP CTGCGCATTCCAAAGGGTTTGTTCATCAG  
 ZP1-sa-OT7-20-FP GAGCGCTATAGACACCACGCAACCACC  
 ZP1-sa-OT7-20-RP CGCTCAGTTCCAAAGGGTTTGTTCATCAG

ZP1-sa-OT8-11-FP TTCTGCCTTTCAATAACCATCAAAGTCCCT  
 ZP1-sa-OT8-11-RP GCTCAGGATTGTCATAGTCAATAGTAAGCAGTCT  
 ZP1-sa-OT8-12-FP AGGAGTCCTTCAATAACCATCAAAGTCCCT  
 ZP1-sa-OT8-12-RP CATGCCTATTGTCATAGTCAATAGTAAGCAGTCT  
 ZP1-sa-OT8-13-FP GTAGAGAGTTCAATAACCATCAAAGTCCCT  
 ZP1-sa-OT8-13-RP CCTCTCTGTTGTCATAGTCAATAGTAAGCAGTCT  
 ZP1-sa-OT8-14-FP AGCGTAGCTTCAATAACCATCAAAGTCCCT  
 ZP1-sa-OT8-14-RP CAGCCTCGTTGTCATAGTCAATAGTAAGCAGTCT  
 ZP1-sa-OT8-15-FP TGCCTCTTTTCAATAACCATCAAAGTCCCT  
 ZP1-sa-OT8-15-RP TCCTCTACTTGTTCATAGTCAATAGTAAGCAGTCT  
 ZP1-sa-OT8-16-FP TCATGAGCTTCAATAACCATCAAAGTCCCT  
 ZP1-sa-OT8-16-RP CCTGAGATTTGTCATAGTCAATAGTAAGCAGTCT  
 ZP1-sa-OT8-17-FP TAGCGAGTTTCAATAACCATCAAAGTCCCT  
 ZP1-sa-OT8-17-RP GTAGCTCCTTGTTCATAGTCAATAGTAAGCAGTCT  
 ZP1-sa-OT8-18-FP TACTACGCTTCAATAACCATCAAAGTCCCT  
 ZP1-sa-OT8-18-RP AGGCTCCGTGTCATAGTCAATAGTAAGCAGTCT  
 ZP1-sa-OT8-19-FP GCAGCGTATTCAATAACCATCAAAGTCCCT  
 ZP1-sa-OT8-19-RP CTGCGCATTGTCATAGTCAATAGTAAGCAGTCT  
 ZP1-sa-OT8-20-FP GAGCGCTATTCAATAACCATCAAAGTCCCT  
 ZP1-sa-OT8-20-RP CGCTCAGTTTGTTCATAGTCAATAGTAAGCAGTCT

ZP1-sa-OT9-11-FP TTCTGCCTTCTCAACCAAGTCAGGGAAATG  
 ZP1-sa-OT9-11-RP GCTCAGGAAAATCAGCACCTGCCTCCAC  
 ZP1-sa-OT9-12-FP AGGAGTCCTCTCAACCAAGTCAGGGAAATG  
 ZP1-sa-OT9-12-RP CATGCCTAAAATCAGCACCTGCCTCCAC  
 ZP1-sa-OT9-13-FP GTAGAGAGTCTCAACCAAGTCAGGGAAATG  
 ZP1-sa-OT9-13-RP CCTCTCTGAAATCAGCACCTGCCTCCAC  
 ZP1-sa-OT9-14-FP AGCGTAGCTCTCAACCAAGTCAGGGAAATG  
 ZP1-sa-OT9-14-RP CAGCCTCGAAATCAGCACCTGCCTCCAC  
 ZP1-sa-OT9-15-FP TGCCTCTTTCTCAACCAAGTCAGGGAAATG

ZP1-sa-OT9-15-RP TCCTCTACAAATCAGCACCTGCCTCCAC  
ZP1-sa-OT9-16-FP TCATGAGCTCTCAACCAAGTCAGGGAAATG  
ZP1-sa-OT9-16-RP CCTGAGATAAATCAGCACCTGCCTCCAC  
ZP1-sa-OT9-17-FP TAGCGAGTTCTCAACCAAGTCAGGGAAATG  
ZP1-sa-OT9-17-RP GTAGTCCAAATCAGCACCTGCCTCCAC  
ZP1-sa-OT9-18-FP TACTACGCTCTCAACCAAGTCAGGGAAATG  
ZP1-sa-OT9-18-RP AGGCTCCGAAATCAGCACCTGCCTCCAC  
ZP1-sa-OT9-19-FP GCAGCGTATCTCAACCAAGTCAGGGAAATG  
ZP1-sa-OT9-19-RP CTGCGCATAAATCAGCACCTGCCTCCAC  
ZP1-sa-OT9-20-FP GAGCGTATCTCAACCAAGTCAGGGAAATG  
ZP1-sa-OT9-20-RP CGCTCAGTAAATCAGCACCTGCCTCCAC

ZP1-sa-OT10-11-FP TTCTGCCTTCCTCTTGGCTGCTGAGACC  
ZP1-sa-OT10-11-RP GCTCAGGAGAACCATTCCCATGAAGCTTTAC  
ZP1-sa-OT10-12-FP AGGAGTCCTCCTCTTGGCTGCTGAGACC  
ZP1-sa-OT10-12-RP CATGCCTAGAACCATTCCCATGAAGCTTTAC  
ZP1-sa-OT10-13-FP GTAGAGAGTCCTCTTGGCTGCTGAGACC  
ZP1-sa-OT10-13-RP CCTCTCTGGAACCATTCCCATGAAGCTTTAC  
ZP1-sa-OT10-14-FP AGCGTAGCTCCTCTTGGCTGCTGAGACC  
ZP1-sa-OT10-14-RP CAGCCTCGGAACCATTCCCATGAAGCTTTAC  
ZP1-sa-OT10-15-FP TGCCTCTTTCCTCTTGGCTGCTGAGACC  
ZP1-sa-OT10-15-RP TCCTCTACGAACCATTCCCATGAAGCTTTAC  
ZP1-sa-OT10-16-FP TCATGAGCTCCTCTTGGCTGCTGAGACC  
ZP1-sa-OT10-16-RP CCTGAGATGAACCATTCCCATGAAGCTTTAC  
ZP1-sa-OT10-17-FP TAGCGAGTTCCTCTTGGCTGCTGAGACC  
ZP1-sa-OT10-17-RP GTAGTCCGAACCATTCCCATGAAGCTTTAC  
ZP1-sa-OT10-18-FP TACTACGCTCCTCTTGGCTGCTGAGACC  
ZP1-sa-OT10-18-RP AGGCTCCGGAACCATTCCCATGAAGCTTTAC  
ZP1-sa-OT10-19-FP GCAGCGTATCCTCTTGGCTGCTGAGACC  
ZP1-sa-OT10-19-RP CTGCGCATGAACCATTCCCATGAAGCTTTAC  
ZP1-sa-OT10-20-FP GAGCGTATCCTCTTGGCTGCTGAGACC  
ZP1-sa-OT10-20-RP CGCTCAGTGAACCATTCCCATGAAGCTTTAC

SLX2-target-1-FP TAGATCGCGACTTTTGGCAACTTAAGGTTT  
SLX2-target-1-RP CTCTCTATACCCCAACAGAGGAAGAACA  
SLX2-target-2-FP TATCCTCTGACTTTTGGCAACTTAAGGTTT  
SLX2-target-2-RP AGAGTAGAACCCCAACAGAGGAAGAACA  
SLX2-target-3-FP GTAAGGAGGACTTTTGGCAACTTAAGGTTT  
SLX2-target-3-RP ACTGCATAACCCCAACAGAGGAAGAACA  
SLX2-target-4-FP AAGGAGTAGACTTTTGGCAACTTAAGGTTT  
SLX2-target-4-RP CTAAGCCTACCCCAACAGAGGAAGAACA  
SLX2-target-5-FP CGTCTAATGACTTTTGGCAACTTAAGGTTT  
SLX2-target-5-RP TCTCTCCGACCCCAACAGAGGAAGAACA  
SLX2-target-6-FP TCGACTAGGACTTTTGGCAACTTAAGGTTT  
SLX2-target-6-RP TTCTAGCTACCCCAACAGAGGAAGAACA  
SLX2-target-7-FP CCTAGAGTGACTTTTGGCAACTTAAGGTTT  
SLX2-target-7-RP GCGTAAGAACCCCAACAGAGGAAGAACA  
SLX2-target-8-FP CTATTAAGGACTTTTGGCAACTTAAGGTTT

|                   |                                 |
|-------------------|---------------------------------|
| SLX2-target-8-RP  | AAGGCTATACCCCAACAGAGGAAGAACA    |
| SLX2-target-9-FP  | GAGCCTTAGACTTTTGGCAACTTAAGGTTT  |
| SLX2-target-9-RP  | TTATGCGAACCCCAACAGAGGAAGAACA    |
| SLX2-target-10-FP | TCGCCTTAGACTTTTGGCAACTTAAGGTTT  |
| SLX2-target-10-RP | CTAGTACGACCCCAACAGAGGAAGAACA    |
| SLX2-sp-OT1-1-FP  | TAGATCGCGGTTACAGCAAAGATGGCTG    |
| SLX2-sp-OT1-1-RP  | CTCTCTATGTGACAAAGGGTGACTTAAGAGT |
| SLX2-sp-OT1-2-FP  | TATCCTCTGGTTACAGCAAAGATGGCTG    |
| SLX2-sp-OT1-2-RP  | AGAGTAGAGTGACAAAGGGTGACTTAAGAGT |
| SLX2-sp-OT1-3-FP  | GTAAGGAGGGTTACAGCAAAGATGGCTG    |
| SLX2-sp-OT1-3-RP  | ACTGCATAGTGACAAAGGGTGACTTAAGAGT |
| SLX2-sp-OT1-4-FP  | AAGGAGTAGGTTACAGCAAAGATGGCTG    |
| SLX2-sp-OT1-4-RP  | CTAAGCCTGTGACAAAGGGTGACTTAAGAGT |
| SLX2-sp-OT1-5-FP  | CGTCTAATGGTTACAGCAAAGATGGCTG    |
| SLX2-sp-OT1-5-RP  | TCTCTCCGGTGACAAAGGGTGACTTAAGAGT |
| SLX2-sp-OT1-6-FP  | TCGACTAGGGTTACAGCAAAGATGGCTG    |
| SLX2-sp-OT1-6-RP  | TTCTAGCTGTGACAAAGGGTGACTTAAGAGT |
| SLX2-sp-OT1-7-FP  | CCTAGAGTGGTTACAGCAAAGATGGCTG    |
| SLX2-sp-OT1-7-RP  | GCGTAAGAGTGACAAAGGGTGACTTAAGAGT |
| SLX2-sp-OT1-8-FP  | CTATTAAGGGTTACAGCAAAGATGGCTG    |
| SLX2-sp-OT1-8-RP  | AAGGCTATGTGACAAAGGGTGACTTAAGAGT |
| SLX2-sp-OT1-9-FP  | GAGCCTTAGGTTACAGCAAAGATGGCTG    |
| SLX2-sp-OT1-9-RP  | TTATGCGAGTGACAAAGGGTGACTTAAGAGT |
| SLX2-sp-OT1-10-FP | TCGCCTTAGGTTACAGCAAAGATGGCTG    |
| SLX2-sp-OT1-10-RP | CTAGTACGGTGACAAAGGGTGACTTAAGAGT |
| SLX2-sp-OT2-1-FP  | TAGATCGCCACCATCTTCAACCAAACCT    |
| SLX2-sp-OT2-1-RP  | CTCTCTATATTCAAGGAACAGGAAACAGA   |
| SLX2-sp-OT2-2-FP  | TATCCTCTCACCATCTTCAACCAAACCT    |
| SLX2-sp-OT2-2-RP  | AGAGTAGAATTCAAGGAACAGGAAACAGA   |
| SLX2-sp-OT2-3-FP  | GTAAGGAGCACCATCTTCAACCAAACCT    |
| SLX2-sp-OT2-3-RP  | ACTGCATAATTCAAGGAACAGGAAACAGA   |
| SLX2-sp-OT2-4-FP  | AAGGAGTACACCATCTTCAACCAAACCT    |
| SLX2-sp-OT2-4-RP  | CTAAGCCTATTCAAGGAACAGGAAACAGA   |
| SLX2-sp-OT2-5-FP  | CGTCTAATCACCATCTTCAACCAAACCT    |
| SLX2-sp-OT2-5-RP  | TCTCTCCGATTCAAGGAACAGGAAACAGA   |
| SLX2-sp-OT2-6-FP  | TCGACTAGCACCATCTTCAACCAAACCT    |
| SLX2-sp-OT2-6-RP  | TTCTAGCTATTCAAGGAACAGGAAACAGA   |
| SLX2-sp-OT2-7-FP  | CCTAGAGTCACCATCTTCAACCAAACCT    |
| SLX2-sp-OT2-7-RP  | GCGTAAGAATTCAAGGAACAGGAAACAGA   |
| SLX2-sp-OT2-8-FP  | CTATTAAGCACCATCTTCAACCAAACCT    |
| SLX2-sp-OT2-8-RP  | AAGGCTATATTCAAGGAACAGGAAACAGA   |
| SLX2-sp-OT2-9-FP  | GAGCCTTACACCATCTTCAACCAAACCT    |
| SLX2-sp-OT2-9-RP  | TTATGCGAATTCAAGGAACAGGAAACAGA   |
| SLX2-sp-OT2-10-FP | TCGCCTTACACCATCTTCAACCAAACCT    |
| SLX2-sp-OT2-10-RP | CTAGTACGATTCAAGGAACAGGAAACAGA   |
| SLX2-sp-OT3-1-FP  | TAGATCGCAGATACCAACTACTCGGTTTCAG |

SLX2-sp-OT3-1-RP CTCTCTATAGATTACTACTGCTGCATGTGAG  
SLX2-sp-OT3-2-FP TATCCTCTAGATACCAACTACTCGGTTTCAG  
SLX2-sp-OT3-2-RP AGAGTAGAAGATTACTACTGCTGCATGTGAG  
SLX2-sp-OT3-3-FP GTAAGGAGAGATACCAACTACTCGGTTTCAG  
SLX2-sp-OT3-3-RP ACTGCATAAGATTACTACTGCTGCATGTGAG  
SLX2-sp-OT3-4-FP AAGGAGTAAGATACCAACTACTCGGTTTCAG  
SLX2-sp-OT3-4-RP CTAAGCCTAGATTACTACTGCTGCATGTGAG  
SLX2-sp-OT3-5-FP CGTCTAATAGATACCAACTACTCGGTTTCAG  
SLX2-sp-OT3-5-RP TCTCTCCGAGATTACTACTGCTGCATGTGAG  
SLX2-sp-OT3-6-FP TCGACTAGAGATACCAACTACTCGGTTTCAG  
SLX2-sp-OT3-6-RP TTCTAGCTAGATTACTACTGCTGCATGTGAG  
SLX2-sp-OT3-7-FP CCTAGAGTAGATACCAACTACTCGGTTTCAG  
SLX2-sp-OT3-7-RP GCGTAAGAAGATTACTACTGCTGCATGTGAG  
SLX2-sp-OT3-8-FP CTATTAAGAGATACCAACTACTCGGTTTCAG  
SLX2-sp-OT3-8-RP AAGGCTATAGATTACTACTGCTGCATGTGAG  
SLX2-sp-OT3-9-FP GAGCCTTAAGATACCAACTACTCGGTTTCAG  
SLX2-sp-OT3-9-RP TTATGCGAAGATTACTACTGCTGCATGTGAG  
SLX2-sp-OT3-10-FP TCGCCTTAAGATACCAACTACTCGGTTTCAG  
SLX2-sp-OT3-10-RP CTAGTACGAGATTACTACTGCTGCATGTGAG

SLX2-sp-OT4-1-FP TAGATCGCGAAACTGTAAGCCAAACCCA  
SLX2-sp-OT4-1-RP CTCTCTATTAATGGAGCCAAAGTAGGGG  
SLX2-sp-OT4-2-FP TATCCTCTGAAACTGTAAGCCAAACCCA  
SLX2-sp-OT4-2-RP AGAGTAGATAATGGAGCCAAAGTAGGGG  
SLX2-sp-OT4-3-FP GTAAGGAGGAAACTGTAAGCCAAACCCA  
SLX2-sp-OT4-3-RP ACTGCATATAATGGAGCCAAAGTAGGGG  
SLX2-sp-OT4-4-FP AAGGAGTAGAAACTGTAAGCCAAACCCA  
SLX2-sp-OT4-4-RP CTAAGCCTTAATGGAGCCAAAGTAGGGG  
SLX2-sp-OT4-5-FP CGTCTAATGAAACTGTAAGCCAAACCCA  
SLX2-sp-OT4-5-RP TCTCTCCGTAATGGAGCCAAAGTAGGGG  
SLX2-sp-OT4-6-FP TCGACTAGGAAACTGTAAGCCAAACCCA  
SLX2-sp-OT4-6-RP TTCTAGCTTAATGGAGCCAAAGTAGGGG  
SLX2-sp-OT4-7-FP CCTAGAGTGAAACTGTAAGCCAAACCCA  
SLX2-sp-OT4-7-RP GCGTAAGATAATGGAGCCAAAGTAGGGG  
SLX2-sp-OT4-8-FP CTATTAAGGAAACTGTAAGCCAAACCCA  
SLX2-sp-OT4-8-RP AAGGCTATTAATGGAGCCAAAGTAGGGG  
SLX2-sp-OT4-9-FP GAGCCTTAGAAACTGTAAGCCAAACCCA  
SLX2-sp-OT4-9-RP TTATGCGATAATGGAGCCAAAGTAGGGG  
SLX2-sp-OT4-10-FP TCGCCTTAGAAACTGTAAGCCAAACCCA  
SLX2-sp-OT4-10-RP CTAGTACGTAATGGAGCCAAAGTAGGGG

SLX2-sp-OT5-1-FP TAGATCGCCATCTTTCTGTAGGAATGTTGCT  
SLX2-sp-OT5-1-RP CTCTCTATAAAACCTATGAGGTTTCAGTAGCA  
SLX2-sp-OT5-2-FP TATCCTCTCATCTTTCTGTAGGAATGTTGCT  
SLX2-sp-OT5-2-RP AGAGTAGAAAAACCTATGAGGTTTCAGTAGCA  
SLX2-sp-OT5-3-FP GTAAGGAGCATCTTTCTGTAGGAATGTTGCT  
SLX2-sp-OT5-3-RP ACTGCATAAAACCTATGAGGTTTCAGTAGCA  
SLX2-sp-OT5-4-FP AAGGAGTACATCTTTCTGTAGGAATGTTGCT

SLX2-sp-OT5-4-RP CTAAGCCTAAAACCTATGAGGTTTCAGTAGCA  
SLX2-sp-OT5-5-FP CGTCTAATCATCTTTCTGTAGGAATGTTGCT  
SLX2-sp-OT5-5-RP TCTCTCCGAAAACCTATGAGGTTTCAGTAGCA  
SLX2-sp-OT5-6-FP TCGACTAGCATCTTTCTGTAGGAATGTTGCT  
SLX2-sp-OT5-6-RP TTCTAGCTAAAACCTATGAGGTTTCAGTAGCA  
SLX2-sp-OT5-7-FP CCTAGAGTCATCTTTCTGTAGGAATGTTGCT  
SLX2-sp-OT5-7-RP GCGTAAGAAAAACCTATGAGGTTTCAGTAGCA  
SLX2-sp-OT5-8-FP CTATTAAGCATCTTTCTGTAGGAATGTTGCT  
SLX2-sp-OT5-8-RP AAGGCTATAAAAACCTATGAGGTTTCAGTAGCA  
SLX2-sp-OT5-9-FP GAGCCTTACATCTTTCTGTAGGAATGTTGCT  
SLX2-sp-OT5-9-RP TTATGCGAAAAACCTATGAGGTTTCAGTAGCA  
SLX2-sp-OT5-10-FP TCGCCTTACATCTTTCTGTAGGAATGTTGCT  
SLX2-sp-OT5-10-RP CTAGTACGAAAACCTATGAGGTTTCAGTAGCA

SLX2-sp-OT6-1-FP TAGATCGCTGATTCAGTAAAGGTGGAGGA  
SLX2-sp-OT6-1-RP CTCTCTATCAGGTGACAGATCGGAAGATA  
SLX2-sp-OT6-2-FP TATCCTCTTGATTCAGTAAAGGTGGAGGA  
SLX2-sp-OT6-2-RP AGAGTAGACAGGTGACAGATCGGAAGATA  
SLX2-sp-OT6-3-FP GTAAGGAGTGATTCAGTAAAGGTGGAGGA  
SLX2-sp-OT6-3-RP ACTGCATACAGGTGACAGATCGGAAGATA  
SLX2-sp-OT6-4-FP AAGGAGTATGATTCAGTAAAGGTGGAGGA  
SLX2-sp-OT6-4-RP CTAAGCCTCAGGTGACAGATCGGAAGATA  
SLX2-sp-OT6-5-FP CGTCTAATTGATTCAGTAAAGGTGGAGGA  
SLX2-sp-OT6-5-RP TCTCTCCGCAGGTGACAGATCGGAAGATA  
SLX2-sp-OT6-6-FP TCGACTAGTGATTCAGTAAAGGTGGAGGA  
SLX2-sp-OT6-6-RP TTCTAGCTCAGGTGACAGATCGGAAGATA  
SLX2-sp-OT6-7-FP CCTAGAGTTGATTCAGTAAAGGTGGAGGA  
SLX2-sp-OT6-7-RP GCGTAAGACAGGTGACAGATCGGAAGATA  
SLX2-sp-OT6-8-FP CTATTAAGTGATTCAGTAAAGGTGGAGGA  
SLX2-sp-OT6-8-RP AAGGCTATCAGGTGACAGATCGGAAGATA  
SLX2-sp-OT6-9-FP GAGCCTTATGATTCAGTAAAGGTGGAGGA  
SLX2-sp-OT6-9-RP TTATGCGACAGGTGACAGATCGGAAGATA  
SLX2-sp-OT6-10-FP TCGCCTTATGATTCAGTAAAGGTGGAGGA  
SLX2-sp-OT6-10-RP CTAGTACGCAGGTGACAGATCGGAAGATA

SLX2-sp-OT7-1-FP TAGATCGCGTTCGCCGTCCAGTAACC  
SLX2-sp-OT7-1-RP CTCTCTATCAGACCATAGCTGTCCCGT  
SLX2-sp-OT7-2-FP TATCCTCTGTTCGCCGTCCAGTAACC  
SLX2-sp-OT7-2-RP AGAGTAGACAGACCATAGCTGTCCCGT  
SLX2-sp-OT7-3-FP GTAAGGAGGTTTCGCCGTCCAGTAACC  
SLX2-sp-OT7-3-RP ACTGCATACAGACCATAGCTGTCCCGT  
SLX2-sp-OT7-4-FP AAGGAGTAGTTCGCCGTCCAGTAACC  
SLX2-sp-OT7-4-RP CTAAGCCTCAGACCATAGCTGTCCCGT  
SLX2-sp-OT7-5-FP CGTCTAATGTTCGCCGTCCAGTAACC  
SLX2-sp-OT7-5-RP TCTCTCCGCAGACCATAGCTGTCCCGT  
SLX2-sp-OT7-6-FP TCGACTAGGTTTCGCCGTCCAGTAACC  
SLX2-sp-OT7-6-RP TTCTAGCTCAGACCATAGCTGTCCCGT  
SLX2-sp-OT7-7-FP CCTAGAGTGTTTCGCCGTCCAGTAACC

SLX2-sp-OT7-7-RP GCGTAAGACAGACCATAGCTGTCCCGT  
SLX2-sp-OT7-8-FP CTATTAAGGTTTCGCCGTCCAGTAACC  
SLX2-sp-OT7-8-RP AAGGCTATCAGACCATAGCTGTCCCGT  
SLX2-sp-OT7-9-FP GAGCCTTAGTTCGCCGTCCAGTAACC  
SLX2-sp-OT7-9-RP TTATGCGACAGACCATAGCTGTCCCGT  
SLX2-sp-OT7-10-FP TCGCCTTAGTTCGCCGTCCAGTAACC  
SLX2-sp-OT7-10-RP CTAGTACGCAGACCATAGCTGTCCCGT  
SLX2-sp-OT8-1-FP TAGATCGCTCTCAGCCGTCATCGATAAT

SLX2-sp-OT8-1-RP CTCTCTATAAGGATGGGGGTGGTGT  
SLX2-sp-OT8-2-FP TATCCTCTTCTCAGCCGTCATCGATAAT  
SLX2-sp-OT8-2-RP AGAGTAGAAAGGATGGGGGTGGTGT  
SLX2-sp-OT8-3-FP GTAAGGAGTCTCAGCCGTCATCGATAAT  
SLX2-sp-OT8-3-RP ACTGCATAAAGGATGGGGGTGGTGT  
SLX2-sp-OT8-4-FP AAGGAGTATCTCAGCCGTCATCGATAAT  
SLX2-sp-OT8-4-RP CTAAGCCTAAGGATGGGGGTGGTGT  
SLX2-sp-OT8-5-FP CGTCTAATTCTCAGCCGTCATCGATAAT  
SLX2-sp-OT8-5-RP TCTCTCCGAAGGATGGGGGTGGTGT  
SLX2-sp-OT8-6-FP TCGACTAGTCTCAGCCGTCATCGATAAT  
SLX2-sp-OT8-6-RP TTCTAGCTAAGGATGGGGGTGGTGT  
SLX2-sp-OT8-7-FP CCTAGAGTTCTCAGCCGTCATCGATAAT  
SLX2-sp-OT8-7-RP GCGTAAGAAAGGATGGGGGTGGTGT  
SLX2-sp-OT8-8-FP CTATTAAGTCTCAGCCGTCATCGATAAT  
SLX2-sp-OT8-8-RP AAGGCTATAAGGATGGGGGTGGTGT  
SLX2-sp-OT8-9-FP GAGCCTTATCTCAGCCGTCATCGATAAT  
SLX2-sp-OT8-9-RP TTATGCGAAAGGATGGGGGTGGTGT  
SLX2-sp-OT8-10-FP TCGCCTTATCTCAGCCGTCATCGATAAT  
SLX2-sp-OT8-10-RP CTAGTACGAAGGATGGGGGTGGTGT

SLX2-sp-OT9-1-FP TAGATCGCAGAGCTGAAGTCACAGGCAG  
SLX2-sp-OT9-1-RP CTCTCTATGAGGAAGATGGGGGAAATG  
SLX2-sp-OT9-2-FP TATCCTCTAGAGCTGAAGTCACAGGCAG  
SLX2-sp-OT9-2-RP AGAGTAGAGAGGAAGATGGGGGAAATG  
SLX2-sp-OT9-3-FP GTAAGGAGAGAGCTGAAGTCACAGGCAG  
SLX2-sp-OT9-3-RP ACTGCATAGAGGAAGATGGGGGAAATG  
SLX2-sp-OT9-4-FP AAGGAGTAAGAGCTGAAGTCACAGGCAG  
SLX2-sp-OT9-4-RP CTAAGCCTGAGGAAGATGGGGGAAATG  
SLX2-sp-OT9-5-FP CGTCTAATAGAGCTGAAGTCACAGGCAG  
SLX2-sp-OT9-5-RP TCTCTCCGAGGAAGATGGGGGAAATG  
SLX2-sp-OT9-6-FP TCGACTAGAGAGCTGAAGTCACAGGCAG  
SLX2-sp-OT9-6-RP TTCTAGCTGAGGAAGATGGGGGAAATG  
SLX2-sp-OT9-7-FP CCTAGAGTAGAGCTGAAGTCACAGGCAG  
SLX2-sp-OT9-7-RP GCGTAAGAGAGGAAGATGGGGGAAATG  
SLX2-sp-OT9-8-FP CTATTAAGAGAGCTGAAGTCACAGGCAG  
SLX2-sp-OT9-8-RP AAGGCTATGAGGAAGATGGGGGAAATG  
SLX2-sp-OT9-9-FP GAGCCTTAAGAGCTGAAGTCACAGGCAG  
SLX2-sp-OT9-9-RP TTATGCGAGAGGAAGATGGGGGAAATG  
SLX2-sp-OT9-10-FP TCGCCTTAAGAGCTGAAGTCACAGGCAG

SLX2-sp-OT9-10-RP CTAGTACGGAGGAAGATGGGGGAAATG

SLX2-sp-OT10-1-FP TAGATCGCACAGGAGATGGCAAGGCTA  
 SLX2-sp-OT10-1-RP CTCTCTATATGACACAGTGACGTGACATAAG  
 SLX2-sp-OT10-2-FP TATCCTCTACAGGAGATGGCAAGGCTA  
 SLX2-sp-OT10-2-RP AGAGTAGAATGACACAGTGACGTGACATAAG  
 SLX2-sp-OT10-3-FP GTAAGGAGACAGGAGATGGCAAGGCTA  
 SLX2-sp-OT10-3-RP ACTGCATAATGACACAGTGACGTGACATAAG  
 SLX2-sp-OT10-4-FP AAGGAGTAACAGGAGATGGCAAGGCTA  
 SLX2-sp-OT10-4-RP CTAAGCCTATGACACAGTGACGTGACATAAG  
 SLX2-sp-OT10-5-FP CGTCTAATACAGGAGATGGCAAGGCTA  
 SLX2-sp-OT10-5-RP TCTCTCCGATGACACAGTGACGTGACATAAG  
 SLX2-sp-OT10-6-FP TCGACTAGACAGGAGATGGCAAGGCTA  
 SLX2-sp-OT10-6-RP TTCTAGCTATGACACAGTGACGTGACATAAG  
 SLX2-sp-OT10-7-FP CCTAGAGTACAGGAGATGGCAAGGCTA  
 SLX2-sp-OT10-7-RP GCGTAAGAATGACACAGTGACGTGACATAAG  
 SLX2-sp-OT10-8-FP CTATTAAGACAGGAGATGGCAAGGCTA  
 SLX2-sp-OT10-8-RP AAGGCTATATGACACAGTGACGTGACATAAG  
 SLX2-sp-OT10-9-FP GAGCCTTAACAGGAGATGGCAAGGCTA  
 SLX2-sp-OT10-9-RP TTATGCGAATGACACAGTGACGTGACATAAG  
 SLX2-sp-OT10-10-FP TCGCCTTAACAGGAGATGGCAAGGCTA  
 SLX2-sp-OT10-10-RP CTAGTACGATGACACAGTGACGTGACATAAG

SLX2-target-11-FP TTCTGCCTGACTTTTGGCAACTTAAGGTTT  
 SLX2-target-11-RP GCTCAGGAACCCCAACAGAGGAAGAACA  
 SLX2-target-12-FP AGGAGTCCGACTTTTGGCAACTTAAGGTTT  
 SLX2-target-12-RP CATGCCTAACCCCAACAGAGGAAGAACA  
 SLX2-target-13-FP GTAGAGAGGACTTTTGGCAACTTAAGGTTT  
 SLX2-target-13-RP CCTCTCTGACCCCAACAGAGGAAGAACA  
 SLX2-target-14-FP AGCGTAGCGACTTTTGGCAACTTAAGGTTT  
 SLX2-target-14-RP CAGCCTCGACCCCAACAGAGGAAGAACA  
 SLX2-target-15-FP TGCCTCTTGACTTTTGGCAACTTAAGGTTT  
 SLX2-target-15-RP TCCTCTACACCCCAACAGAGGAAGAACA  
 SLX2-target-16-FP TCATGAGCGACTTTTGGCAACTTAAGGTTT  
 SLX2-target-16-RP CCTGAGATAACCCCAACAGAGGAAGAACA  
 SLX2-target-17-FP TAGCGAGTGACTTTTGGCAACTTAAGGTTT  
 SLX2-target-17-RP GTAGCTCCACCCCAACAGAGGAAGAACA  
 SLX2-target-18-FP TACTACGCGACTTTTGGCAACTTAAGGTTT  
 SLX2-target-18-RP AGGCTCCGACCCCAACAGAGGAAGAACA  
 SLX2-target-19-FP GCAGCGTAGACTTTTGGCAACTTAAGGTTT  
 SLX2-target-19-RP CTGCGCATACCCCAACAGAGGAAGAACA  
 SLX2-target-20-FP GAGCGCTAGACTTTTGGCAACTTAAGGTTT  
 SLX2-target-20-RP CGCTCAGTACCCCAACAGAGGAAGAACA

SLX2-sa-OT1-11-FP TTCTGCCTGTGAAAGTAAATTAATTTCCAAG  
 SLX2-sa-OT1-11-RP GCTCAGGACTAGACAGGAAATGGGAAAAA  
 SLX2-sa-OT1-12-FP AGGAGTCCGTGAAAGTAAATTAATTTCCAAG  
 SLX2-sa-OT1-12-RP CATGCCTACTAGACAGGAAATGGGAAAAA



SLX2-sa-OT1-13-FP GTAGAGAGGTGAAAGTAAATTAATTTCCAAG  
SLX2-sa-OT1-13-RP CCTCTCTGCTAGACAGGAAATGGGAAAAA  
SLX2-sa-OT1-14-FP AGCGTAGCGTGAAAGTAAATTAATTTCCAAG  
SLX2-sa-OT1-14-RP CAGCCTCGCTAGACAGGAAATGGGAAAAA  
SLX2-sa-OT1-15-FP TGCCTCTTGTGAAAGTAAATTAATTTCCAAG  
SLX2-sa-OT1-15-RP TCCTCTACCTAGACAGGAAATGGGAAAAA  
SLX2-sa-OT1-16-FP TCATGAGCGTGAAAGTAAATTAATTTCCAAG  
SLX2-sa-OT1-16-RP CCTGAGATCTAGACAGGAAATGGGAAAAA  
SLX2-sa-OT1-17-FP TAGCGAGTGTGAAAGTAAATTAATTTCCAAG  
SLX2-sa-OT1-17-RP GTAGCTCCCTAGACAGGAAATGGGAAAAA  
SLX2-sa-OT1-18-FP TACTACGCGTGAAAGTAAATTAATTTCCAAG  
SLX2-sa-OT1-18-RP AGGCTCCGCTAGACAGGAAATGGGAAAAA  
SLX2-sa-OT1-19-FP GCAGCGTAGTGAAAGTAAATTAATTTCCAAG  
SLX2-sa-OT1-19-RP CTGCGCATCTAGACAGGAAATGGGAAAAA  
SLX2-sa-OT1-20-FP GAGCGCTAGTGAAAGTAAATTAATTTCCAAG  
SLX2-sa-OT1-20-RP CGCTCAGTCTAGACAGGAAATGGGAAAAA

SLX2-sa-OT2-11-FP TTCTGCCTAAAGGAGCCAGAGTTCCAG  
SLX2-sa-OT2-11-RP GCTCAGGATGTTCTTCACGTTTCTTGTCC  
SLX2-sa-OT2-12-FP AGGAGTCCAAAGGAGCCAGAGTTCCAG  
SLX2-sa-OT2-12-RP CATGCCTATGTTCTTCACGTTTCTTGTCC  
SLX2-sa-OT2-13-FP GTAGAGAGAAAGGAGCCAGAGTTCCAG  
SLX2-sa-OT2-13-RP CCTCTCTGTGTTCTTCACGTTTCTTGTCC  
SLX2-sa-OT2-14-FP AGCGTAGCAAAGGAGCCAGAGTTCCAG  
SLX2-sa-OT2-14-RP CAGCCTCGTGTTCTTCACGTTTCTTGTCC  
SLX2-sa-OT2-15-FP TGCCTCTTAAAGGAGCCAGAGTTCCAG  
SLX2-sa-OT2-15-RP TCCTCTACTGTTCTTCACGTTTCTTGTCC  
SLX2-sa-OT2-16-FP TCATGAGCAAAGGAGCCAGAGTTCCAG  
SLX2-sa-OT2-16-RP CCTGAGATTGTTCTTCACGTTTCTTGTCC  
SLX2-sa-OT2-17-FP TAGCGAGTAAAGGAGCCAGAGTTCCAG  
SLX2-sa-OT2-17-RP GTAGCTCCTGTTCTTCACGTTTCTTGTCC  
SLX2-sa-OT2-18-FP TACTACGCAAAGGAGCCAGAGTTCCAG  
SLX2-sa-OT2-18-RP AGGCTCCGTGTTCTTCACGTTTCTTGTCC  
SLX2-sa-OT2-19-FP GCAGCGTAAAAGGAGCCAGAGTTCCAG  
SLX2-sa-OT2-19-RP CTGCGCATTGTTCTTCACGTTTCTTGTCC  
SLX2-sa-OT2-20-FP GAGCGCTAAAAGGAGCCAGAGTTCCAG  
SLX2-sa-OT2-20-RP CGCTCAGTTGTTCTTCACGTTTCTTGTCC

SLX2-sa-OT3-11-FP TTCTGCCTCTTTCCCGTGTTGGTTGG  
SLX2-sa-OT3-11-RP GCTCAGGAGTCCCAGGGTGAGGAAGA  
SLX2-sa-OT3-12-FP AGGAGTCCCTTTCCCGTGTTGGTTGG  
SLX2-sa-OT3-12-RP CATGCCTAGTCCCAGGGTGAGGAAGA  
SLX2-sa-OT3-13-FP GTAGAGAGCTTTCCCGTGTTGGTTGG  
SLX2-sa-OT3-13-RP CCTCTCTGGTCCCAGGGTGAGGAAGA  
SLX2-sa-OT3-14-FP AGCGTAGCCTTTCCCGTGTTGGTTGG  
SLX2-sa-OT3-14-RP CAGCCTCGGTCCCAGGGTGAGGAAGA  
SLX2-sa-OT3-15-FP TGCCTCTTCTTTCCCGTGTTGGTTGG  
SLX2-sa-OT3-15-RP TCCTCTACGTCCCAGGGTGAGGAAGA

SLX2-sa-OT3-16-FP TCATGAGCCTTTCCCGTGTGGTTGG  
SLX2-sa-OT3-16-RP CCTGAGATGTCCAGGGTGAGGAAGA  
SLX2-sa-OT3-17-FP TAGCGAGTCTTTCCCGTGTGGTTGG  
SLX2-sa-OT3-17-RP GTAGCTCCGTCCAGGGTGAGGAAGA  
SLX2-sa-OT3-18-FP TACTACGCCTTTCCCGTGTGGTTGG  
SLX2-sa-OT3-18-RP AGGCTCCGTCCAGGGTGAGGAAGA  
SLX2-sa-OT3-19-FP GCAGCGTACTTTCCCGTGTGGTTGG  
SLX2-sa-OT3-19-RP CTGCGCATGTCCAGGGTGAGGAAGA  
SLX2-sa-OT3-20-FP GAGCGTACTTTCCCGTGTGGTTGG  
SLX2-sa-OT3-20-RP CGCTCAGTGTCCAGGGTGAGGAAGA

SLX2-sa-OT4-11-FP TTCTGCCTACATTTCTAGAGCACCGGAGT  
SLX2-sa-OT4-11-RP GCTCAGGAACATCAAGTGAATCATAAAACATG  
SLX2-sa-OT4-12-FP AGGAGTCCACATTTCTAGAGCACCGGAGT  
SLX2-sa-OT4-12-RP CATGCCTAACATCAAGTGAATCATAAAACATG  
SLX2-sa-OT4-13-FP GTAGAGAGACATTTCTAGAGCACCGGAGT  
SLX2-sa-OT4-13-RP CCTCTCTGACATCAAGTGAATCATAAAACATG  
SLX2-sa-OT4-14-FP AGCGTAGCACATTTCTAGAGCACCGGAGT  
SLX2-sa-OT4-14-RP CAGCCTCGACATCAAGTGAATCATAAAACATG  
SLX2-sa-OT4-15-FP TGCCTCTTACATTTCTAGAGCACCGGAGT  
SLX2-sa-OT4-15-RP TCCTCTACACATCAAGTGAATCATAAAACATG  
SLX2-sa-OT4-16-FP TCATGAGCACATTTCTAGAGCACCGGAGT  
SLX2-sa-OT4-16-RP CCTGAGATACATCAAGTGAATCATAAAACATG  
SLX2-sa-OT4-17-FP TAGCGAGTACATTTCTAGAGCACCGGAGT  
SLX2-sa-OT4-17-RP GTAGCTCCACATCAAGTGAATCATAAAACATG  
SLX2-sa-OT4-18-FP TACTACGCACATTTCTAGAGCACCGGAGT  
SLX2-sa-OT4-18-RP AGGCTCCGACATCAAGTGAATCATAAAACATG  
SLX2-sa-OT4-19-FP GCAGCGTAACATTTCTAGAGCACCGGAGT  
SLX2-sa-OT4-19-RP CTGCGCATAACATCAAGTGAATCATAAAACATG  
SLX2-sa-OT4-20-FP GAGCGTAACATTTCTAGAGCACCGGAGT  
SLX2-sa-OT4-20-RP CGCTCAGTACATCAAGTGAATCATAAAACATG

SLX2-sa-OT5-11-FP TTCTGCCTAACTAACTTTCTAGACAAGGCTGG  
SLX2-sa-OT5-11-RP GCTCAGGAAAAGGATTTTATTTTCTGTATTTC  
SLX2-sa-OT5-12-FP AGGAGTCCAATACTTTCTAGACAAGGCTGG  
SLX2-sa-OT5-12-RP CATGCCTAAAAGGATTTTATTTTCTGTATTTC  
SLX2-sa-OT5-13-FP GTAGAGAGAACTAACTTTCTAGACAAGGCTGG  
SLX2-sa-OT5-13-RP CCTCTCTGAAAGGATTTTATTTTCTGTATTTC  
SLX2-sa-OT5-14-FP AGCGTAGCAACTAACTTTCTAGACAAGGCTGG  
SLX2-sa-OT5-14-RP CAGCCTCGAAAGGATTTTATTTTCTGTATTTC  
SLX2-sa-OT5-15-FP TGCCTCTTAACTAACTTTCTAGACAAGGCTGG  
SLX2-sa-OT5-15-RP TCCTCTACAAAGGATTTTATTTTCTGTATTTC  
SLX2-sa-OT5-16-FP TCATGAGCAACTAACTTTCTAGACAAGGCTGG  
SLX2-sa-OT5-16-RP CCTGAGATAAAGGATTTTATTTTCTGTATTTC  
SLX2-sa-OT5-17-FP TAGCGAGTAACTAACTTTCTAGACAAGGCTGG  
SLX2-sa-OT5-17-RP GTAGCTCCAAAGGATTTTATTTTCTGTATTTC  
SLX2-sa-OT5-18-FP TACTACGCAACTAACTTTCTAGACAAGGCTGG  
SLX2-sa-OT5-18-RP AGGCTCCGAAAGGATTTTATTTTCTGTATTTC

SLX2-sa-OT5-19-FP GCAGCGTAAACTAACTTTCTAGACAAGGCTGG  
SLX2-sa-OT5-19-RP CTGCGCATAAAGGATTTTATTTTCTGTATTTCC  
SLX2-sa-OT5-20-FP GAGCGCTAAACTAACTTTCTAGACAAGGCTGG  
SLX2-sa-OT5-20-RP CGCTCAGTAAAGGATTTTATTTTCTGTATTTCC

SLX2-sa-OT6-11-FP TTCTGCCTAACGAAAAAAGAGTCACAGGA  
SLX2-sa-OT6-11-RP GCTCAGGAAAAAGGATGGAGTTGTATGAGA  
SLX2-sa-OT6-12-FP AGGAGTCCAACGAAAAAAGAGTCACAGGA  
SLX2-sa-OT6-12-RP CATGCCTAAAAAGGATGGAGTTGTATGAGA  
SLX2-sa-OT6-13-FP GTAGAGAGAACGAAAAAAGAGTCACAGGA  
SLX2-sa-OT6-13-RP CCTCTCTGAAAAGGATGGAGTTGTATGAGA  
SLX2-sa-OT6-14-FP AGCGTAGCAACGAAAAAAGAGTCACAGGA  
SLX2-sa-OT6-14-RP CAGCCTCGAAAAGGATGGAGTTGTATGAGA  
SLX2-sa-OT6-15-FP TGCCTCTTAACGAAAAAAGAGTCACAGGA  
SLX2-sa-OT6-15-RP TCCTCTACAAAAGGATGGAGTTGTATGAGA  
SLX2-sa-OT6-16-FP TCATGAGCAACGAAAAAAGAGTCACAGGA  
SLX2-sa-OT6-16-RP CCTGAGATAAAAGGATGGAGTTGTATGAGA  
SLX2-sa-OT6-17-FP TAGCGAGTAACGAAAAAAGAGTCACAGGA  
SLX2-sa-OT6-17-RP GTAGCTCCAAAAGGATGGAGTTGTATGAGA  
SLX2-sa-OT6-18-FP TACTACGCAACGAAAAAAGAGTCACAGGA  
SLX2-sa-OT6-18-RP AGGCTCCGAAAAGGATGGAGTTGTATGAGA  
SLX2-sa-OT6-19-FP GCAGCGTAAACGAAAAAAGAGTCACAGGA  
SLX2-sa-OT6-19-RP CTGCGCATAAAAGGATGGAGTTGTATGAGA  
SLX2-sa-OT6-20-FP GAGCGCTAAACGAAAAAAGAGTCACAGGA  
SLX2-sa-OT6-20-RP CGCTCAGTAAAAGGATGGAGTTGTATGAGA

SLX2-sa-OT7-11-FP TTCTGCCTCTAACCTTTTCCCCACTGTGT  
SLX2-sa-OT7-11-RP GCTCAGGATGATTGCTGGACTTCGATATT  
SLX2-sa-OT7-12-FP AGGAGTCCCTAACCTTTTCCCCACTGTGT  
SLX2-sa-OT7-12-RP CATGCCTATGATTGCTGGACTTCGATATT  
SLX2-sa-OT7-13-FP GTAGAGAGCTAACCTTTTCCCCACTGTGT  
SLX2-sa-OT7-13-RP CCTCTCTGTGATTGCTGGACTTCGATATT  
SLX2-sa-OT7-14-FP AGCGTAGCCTAACCTTTTCCCCACTGTGT  
SLX2-sa-OT7-14-RP CAGCCTCGTGATTGCTGGACTTCGATATT  
SLX2-sa-OT7-15-FP TGCCTCTTCTAACCTTTTCCCCACTGTGT  
SLX2-sa-OT7-15-RP TCCTCTACTGATTGCTGGACTTCGATATT  
SLX2-sa-OT7-16-FP TCATGAGCCTAACCTTTTCCCCACTGTGT  
SLX2-sa-OT7-16-RP CCTGAGATTGATTGCTGGACTTCGATATT  
SLX2-sa-OT7-17-FP TAGCGAGTCTAACCTTTTCCCCACTGTGT  
SLX2-sa-OT7-17-RP GTAGCTCCTGATTGCTGGACTTCGATATT  
SLX2-sa-OT7-18-FP TACTACGCCTAACCTTTTCCCCACTGTGT  
SLX2-sa-OT7-18-RP AGGCTCCGTGATTGCTGGACTTCGATATT  
SLX2-sa-OT7-19-FP GCAGCGTACTAACCTTTTCCCCACTGTGT  
SLX2-sa-OT7-19-RP CTGCGCATTGATTGCTGGACTTCGATATT  
SLX2-sa-OT7-20-FP GAGCGTACTAACCTTTTCCCCACTGTGT  
SLX2-sa-OT7-20-RP CGCTCAGTTGATTGCTGGACTTCGATATT

SLX2-sa-OT8-11-FP TTCTGCCTTTTTGTGTGTGTTGTGTACAGTG

SLX2-sa-OT8-11-RP GCTCAGGAAATGTGTTGATTTTGTGAGGG  
SLX2-sa-OT8-12-FP AGGAGTCCTTTTGTGTGTGTTGTGTACAGTG  
SLX2-sa-OT8-12-RP CATGCCTAAATGTGTTGATTTTGTGAGGG  
SLX2-sa-OT8-13-FP GTAGAGAGTTTTGTGTGTGTTGTGTACAGTG  
SLX2-sa-OT8-13-RP CCTCTCTGAATGTGTTGATTTTGTGAGGG  
SLX2-sa-OT8-14-FP AGCGTAGCTTTTGTGTGTGTTGTGTACAGTG  
SLX2-sa-OT8-14-RP CAGCCTCGAATGTGTTGATTTTGTGAGGG  
SLX2-sa-OT8-15-FP TGCCTCTTTTTTGTGTGTGTTGTGTACAGTG  
SLX2-sa-OT8-15-RP TCCTCTACAATGTGTTGATTTTGTGAGGG  
SLX2-sa-OT8-16-FP TCATGAGCTTTTGTGTGTGTTGTGTACAGTG  
SLX2-sa-OT8-16-RP CCTGAGATAATGTGTTGATTTTGTGAGGG  
SLX2-sa-OT8-17-FP TAGCGAGTTTTTGTGTGTGTTGTGTACAGTG  
SLX2-sa-OT8-17-RP GTAGCTCCAATGTGTTGATTTTGTGAGGG  
SLX2-sa-OT8-18-FP TACTACGCTTTTGTGTGTGTTGTGTACAGTG  
SLX2-sa-OT8-18-RP AGGCTCCGAATGTGTTGATTTTGTGAGGG  
SLX2-sa-OT8-19-FP GCAGCGTATTTTGTGTGTGTTGTGTACAGTG  
SLX2-sa-OT8-19-RP CTGCGCATAATGTGTTGATTTTGTGAGGG  
SLX2-sa-OT8-20-FP GAGCGCTATTTTGTGTGTGTTGTGTACAGTG  
SLX2-sa-OT8-20-RP CGCTCAGTAATGTGTTGATTTTGTGAGGG

SLX2-sa-OT9-11-FP TTCTGCCTTGTCTGACACGTTGGGTTC  
SLX2-sa-OT9-11-RP GCTCAGGAGCTGCTGGAGCCTTTCTAT  
SLX2-sa-OT9-12-FP AGGAGTCCTGTCTGACACGTTGGGTTC  
SLX2-sa-OT9-12-RP CATGCCTAGCTGCTGGAGCCTTTCTAT  
SLX2-sa-OT9-13-FP GTAGAGAGTGTCTGACACGTTGGGTTC  
SLX2-sa-OT9-13-RP CCTCTCTGGCTGCTGGAGCCTTTCTAT  
SLX2-sa-OT9-14-FP AGCGTAGCTGTCTGACACGTTGGGTTC  
SLX2-sa-OT9-14-RP CAGCCTCGGCTGCTGGAGCCTTTCTAT  
SLX2-sa-OT9-15-FP TGCCTCTTTGTCTGACACGTTGGGTTC  
SLX2-sa-OT9-15-RP TCCTCTACGCTGCTGGAGCCTTTCTAT  
SLX2-sa-OT9-16-FP TCATGAGCTGTCTGACACGTTGGGTTC  
SLX2-sa-OT9-16-RP CCTGAGATGCTGCTGGAGCCTTTCTAT  
SLX2-sa-OT9-17-FP TAGCGAGTTGTCTGACACGTTGGGTTC  
SLX2-sa-OT9-17-RP GTAGCTCCGCTGCTGGAGCCTTTCTAT  
SLX2-sa-OT9-18-FP TACTACGCTGTCTGACACGTTGGGTTC  
SLX2-sa-OT9-18-RP AGGCTCCGGCTGCTGGAGCCTTTCTAT  
SLX2-sa-OT9-19-FP GCAGCGTATGTCTGACACGTTGGGTTC  
SLX2-sa-OT9-19-RP CTGCGCATGCTGCTGGAGCCTTTCTAT  
SLX2-sa-OT9-20-FP GAGCGCTATGTCTGACACGTTGGGTTC  
SLX2-sa-OT9-20-RP CGCTCAGTGCTGCTGGAGCCTTTCTAT

SLX2-sa-OT10-11-FP TTCTGCCTACTGCTCCGGTCAGGAAC  
SLX2-sa-OT10-11-RP GCTCAGGACAATCACAAACCTCACATATGG  
SLX2-sa-OT10-12-FP AGGAGTCCACTGCTCCGGTCAGGAAC  
SLX2-sa-OT10-12-RP CATGCCTACAATCACAAACCTCACATATGG  
SLX2-sa-OT10-13-FP GTAGAGAGACTGCTCCGGTCAGGAAC  
SLX2-sa-OT10-13-RP CCTCTCTGCAATCACAAACCTCACATATGG  
SLX2-sa-OT10-14-FP AGCGTAGCACTGCTCCGGTCAGGAAC

SLX2-sa-OT10-14-RP CAGCCTCGCAATCACAAACCTCACATATGG  
SLX2-sa-OT10-15-FP TGCCTCTTACTGCTCCGGTCAGGAAC  
SLX2-sa-OT10-15-RP TCCTCTACCAATCACAAACCTCACATATGG  
SLX2-sa-OT10-16-FP TCATGAGCACTGCTCCGGTCAGGAAC  
SLX2-sa-OT10-16-RP CCTGAGATCAATCACAAACCTCACATATGG  
SLX2-sa-OT10-17-FP TAGCGAGTACTGCTCCGGTCAGGAAC  
SLX2-sa-OT10-17-RP GTAGCTCCCAATCACAAACCTCACATATGG  
SLX2-sa-OT10-18-FP TACTACGCACTGCTCCGGTCAGGAAC  
SLX2-sa-OT10-18-RP AGGCTCCGCAATCACAAACCTCACATATGG  
SLX2-sa-OT10-19-FP GCAGCGTAACTGCTCCGGTCAGGAAC  
SLX2-sa-OT10-19-RP CTGCGCATCAATCACAAACCTCACATATGG  
SLX2-sa-OT10-20-FP GAGCGTAACTGCTCCGGTCAGGAAC  
SLX2-sa-OT10-20-RP CGCTCAGTCAATCACAAACCTCACATATGG
